# Supplementary material for: In vivo Monitoring of Transcriptional Dynamics After Lower-Limb Muscle Injury Enables Quantitative Classification of Healing
Source: PubMed Central journal article supplement (PMC4585378; doi:10.1038/srep13885), 2015-09-18
Supplement: srep13885-s1.pdf [file srep13885-s1.pdf]

# In vivo Monitoring of Transcriptional Dynamics After Lower-Limb Muscle Injury Enables Quantitative Classification of Healing

Carlos A. Aguilar<sup>1\*</sup>, Anna Shcherbina<sup>1</sup>, Darrell Ricke<sup>1</sup>, Ramona Pop<sup>2</sup>, Christopher T. Carrigan<sup>3</sup>, Casey A. Gifford<sup>2</sup>, Maria L. Urso<sup>3,†</sup>, Melissa A. Kottke<sup>3</sup>, Alexander Meissner<sup>2</sup>

## Supplementary Materials

Text S1: Transcriptional Signatures of Inflammation and Immune System Detected in Early Period

Text S2: Transcriptional Signatures Associated With Injured Muscle Tissue Extracellular Matrix

Text S3: Injured Muscle Tissue Microenvironment Regulates Existing and Invading Cellular Migration, Proliferation, Differentiation and Phenotype

Text S4: Activation of Muscle Repair Machinery

Text S5: Late Transcriptional Programs Activated in Response to Traumatic LLMI

Fig. S1. Immuno-histological analysis of muscle after cryo-injury.

Fig. S2. a) Example of reproducibility from RNA-Seq datasets. Biological replicates of *in vivo* isolated RNA samples from 24 hours after injury. Sequencing libraries were prepared from the isolated RNA and a strong correlation ( $R^2 = 0.95$ ) was observed for two representative examples. b) Validation of RNA-Seq data with qPCR comparing the injured versus uninjured samples for the 3 hour time point. c) Validation of RNA-Seq data with qPCR comparing the injured versus uninjured samples for the 10 hour time point. d) Validation of RNA-Seq data with qPCR comparing the injured versus uninjured samples for the 24 hour time point.

Fig. S3. Number of differentially expressed genes.

Fig. S4. Gene Sets Activated Early After Injury (3-24 hrs) a) Enriched KEGG pathways from differentially expressed genes for the early time points (3-24 hrs). The size of the circle corresponds to the number of significant genes with each enriched pathway. b) Heatmap of genes associated metabolism expressed in the early time period. c) Gene expression profile of Arginase 1 (Arg1), which is a molecule emitted by type 2 macrophages to balance inflammatory reactive-oxygen species present in the injured tissue. Red-Injured, Blue-Uninjured

Fig. S5. Examples of alternative splicing in immune network of genes.

Fig. S6. Genes associated with hematopoietic activation, proliferation and anti-inflammatory cytokines activated in early & middle periods.

Fig. S7. Gene sets associated with extra-cellular matrix remodeling & satellite cell activation.

Fig. S8. a) Enriched KEGG pathways from differentially expressed genes for the late time points. The size of the circle corresponds to the number of significant genes with each enriched pathway. b) Heatmaps of gene sets activated in late period categorized by function.

Fig. S9. Area plots of FDR values for Gene Annotation (GO) clusters over time. GO terms were separated into major functional categories, and the IQR was computed for the terms in each group. The grey lines indicate the 25<sup>th</sup> and 75<sup>th</sup> percentiles, red lines denote the 25% of gene FDR values, the blue line denotes the median FDR value, and the green line denotes the 75% for FDR.

Fig. S10. Pathway-level scoring results for test datasets from PCA and the timepoint signatures methods. a) Principal component analysis. b) Normalized time point signatures method applied to mean pathway expression values. Timepoint signatures for 6 test samples and a truth training sample. The green curve indicates the control sample that was misclassified by the algorithm at the pathway level. Time point signatures for the 9 time points (blue lines) as well as 6 test samples (red and green lines).

Fig. S11. Differentially expressed gene pathways in injured samples over time.

Table S1. Significant GO clusters (FDR <0.05) identified for differentially expressed genes through the DAVID annotation tool. Each tab represents the annotations derived for each timepoint, clustered by function and sorted by FDR value from most to least significant.

Table S2: KEGG pathways identified for differentially expressed genes (FDR < 0.05). Pathways are listed for each timepoint and sorted by FDR value from most to least significant.

Table S3. Significant GO clusters identified from the 168h time point that were obtained from differentially expressed genes that were determined to contribute the largest variance at that time point.

*Text S1: Transcriptional Signatures of Inflammation and Immune System Detected in Early Period*

Pro-inflammatory cytokines and chemotactic protein members: IL-1 $\beta$ , IL-6, IL-18, Tnf $\alpha$ , Osm, Ccl2, Ccr2, Cxcr2, Trem2, S100a8, FDR=2.21e-22 - GO:0034097, response to cytokine

Anti-inflammatory genes: Socs3, IL-1rn, IL-4 $\alpha$ , IL-10 $\alpha$ , IL-13 $\alpha$ 1, FDR=4.31e-10 - GO:0050728, negative regulation of inflammatory response

Invading immune cell genes: Cd68, Ly6c, Cd14, Cd163, Mrc1, Ptprc, Cd24a, Cd63, Itgam, Clec7a, Ltf, Irf7, Hp, FDR=7.6e-7 - GO:0050900, leukocyte migration involved in inflammatory response

Cytokines and chemokines: Ym1, S100a9, Spp1, Ccr1, Ccl3, Ccl11, Lcn2, Cxcl5, Ccl12, FDR=3.8e-44 - GO:0001816, cytokine production, FDR=9.05e-14 - GO:0032602, chemokine production

Signaling lymphocytic activation molecule family: Slamf7, Slamf8, Ly9, FDR=3.44e-16 - GO:0046649, lymphocyte activation

Pro-apoptotic loci: Casp1, Casp4, Casp8, Apaf1, Fas, FDR=1.40e-9 - GO:2001235, positive regulation of apoptotic signaling pathway

Anti-apoptotic loci: Xiap, Birc3, Birc5, Api5, Bax, Mcl1, Bcl2l1, FDR=2.17e-23 - GO:0043066, negative regulation of apoptotic process

*Text S2: Transcriptional Signatures Associated With Injured Muscle Tissue Extracellular Matrix*

Structural components of extra-cellular matrix (ECM) remodeling: Colla1, Colla2, Col3a1, Col5a1, Col5a2, Col5a3, Col6a1, Col6a2, Col6a3, Eln, FDR=4.19e-111 - GO:0016043, cellular component organization

Connective tissue: Fbn1, Ctgf, Has1, Hbegf, Fn1, Sparc, Tnc, FDR=6.65e-14 - GO:0061448, connective tissue development

ECM cross-linking enzymes: Lox, Loxl1, Loxl2, Plod3, Leprel2, P4hb

Small leucine-rich proteoglycans: Dcn, Bgn, Kera, Vcan, Lum, Ogn, FDR=3.69e-28 - GO:0036211, protein modification process

Adhesive glycoproteins: Pcolce, Itbpbp1, Lgals1, Dpt, Postn, Emilin2, Efemp2, Igfbp7, FDR=3.36e-16 - GO:0043062, extracellular structure organization

Tgf- $\beta$  superfamily: Tgf- $\beta$ i, Tgf- $\beta$ r1, Tgf- $\beta$ r2, Tgf- $\beta$ 1

Formation and stabilization of blood vessels and arterial repair: Ang, Angpt2, Angptl1, Angptl4, Angptl7, Cthrc1, Aif1, FDR=3.12e-10 - GO:0001525, angiogenesis

Contractile fibers: ActB, Actg, Capg, Arpc3, Cotl1, Tln1, Tagln, Vcl, RhoA, FDR=7.8e-5 - GO:0030833, regulate actin filament polymerization, FDR=1.5e-3 - GO:0032273, positive regulation of protein polymerization

Integrin-associated genes: Itga5, Itga7, Itgam, Itgav, Itgb1, Itgb2, FDR=3.34e-5 - GO:0007229, integrin-mediated signaling pathway

Mmps, Adams and Timps: Mmp2, Mmp3, Mmp8, Mmp14, Mmp19, Adam8, Adam15, Adam19, Timp1, Timp2, FDR=6.83e-8 - GO:0048771, tissue remodeling

*Text S3: Injured Muscle Tissue Changes from Pro- to Anti-Inflammatory States Several Days After Injury*

Innate immunity and microbial recognition: Tlr1, Tlr7, Tlr8, FDR=0.003 - GO:0034121, regulation of toll-like receptor signaling pathway

Antigen presentation and hematopoietic activation and proliferation: Ptprc, IL-21r, IL-17ra, Vav1, Lyz2, Csf1r, Csf2rb, Csf2ra, Il3ra, Il5ra, Ifi204, Aif1, FDR=1.4e-8 - GO:0042110, T cell activation, FDR=8.18e-19 - GO:0030097, Haematopoiesis

Anti-inflammatory cytokines: IL-1rl1, Il-4ra, IL-10 $\alpha$ , Msr1, IL-13ra1, S100a9, FDR=2.9e-10 - KEGG mmu04630, cytokine-cytokine receptor interaction, FDR=9e-3 - GO:0010934, macrophage cytokine production

Phagocytic and complement cascade genes: Cyba, Ncf1, Ncf2, Ncf4, C1qa, C1qb, C1qc, C1ra, C1s, FDR=3.37e-8 - GO:0006956, complement activation, FDR=7e-6 - GO:0006909, phagocytosis

Notch signaling: Dll1, Notch2, Myc, Rbpj, Cdkn1a, FDR = 3.69e-18, GO:0002684, positive regulation of immune system process

Bone morphogenetic proteins: Bmp1, Bmp4, FDR = 0.08, GO:0005125, cytokine activity

Actively proliferating cells: Cdk1, FDR = 9.63e-9, GO:0007049, cell cycle

*Text S4: Activation of Muscle Repair Machinery*

Satellite cell markers: CD34, Itga7, Itgb1, Sdc3, Sdc4, Sdcbp, Cav1, Cxcr4, Cdh15, Ly6a, FDR=4.933e-5 - GO:0007519, muscle tissue development

Muscle-fusion genes: Tmem8c, Cdh15, Capn2, Capns1, Myof, Cav3, Itgb1, Vcam1, Itga4, FDR=2.5e-6 - GO:0098602, single organism cell adhesion

Basement membrane genes: Col4a1, Col4a2, Dysf, Trim72, Lamc2, Cav3, Ahnak, Anxa1, Anxa2, Anxa5, FDR=4.78e-9 - GO:0061024, membrane organization

Muscle-specific actins, myosins, troponins, and tropomyosins: Actl9, Clrn1, Myh3, Myl4, Myl6b, Cald1, Tpm4, Tnni1, Tnni3, Tnnt1, Tnnt2, Tnnc1, Tpm3, Des, Vim

Transcription factors: Itgb2, Rrad, Fos, JunB, FosB, Pbx2, Pbx3, Dusp5, Myc, BMyc, Mt3, Egr1, Egr2, Sgms2, Runx1, Grn, Pdlim3, Csrp3, Usf1, Arid5b, Naca, Ankrd1, Ankrd2, Atf3, Atf4, Atf6, Xbp1, Tead4, Nfe2l2, FDR=2.46e-10 - GO:0006351, transcription, DNA-templated

*Text S5: Late Transcriptional Programs Activated in Response to Traumatic LLMI*

Chemotaxis genes: Ccl6, Ccl8, Ccl9, Cxcl16, Fcer1g, Fcgr3, FDR=1.9e-5

Mast cell activation: Fyb, Fcer1g, Fcgr3, Fcgr2b, Lat2, Lcp2, FDR=3.33e-5 - GO:0045576, mast cell activation

Fc receptors: Fcer1g, Fcgr1, Fcgr3, Fcgr2b, Clec7a, Colec12, Hck, Sirpa, Slc11a1, Vav1, FDR=0.035 for KEGG mmu04664, Fc epsilon RI signaling pathway.

Lectins: Clec12a, Clec4a1, Clec4a2, Clec4a3, Clec4n, Clec7a, Clec10a.

Collagen fibril organization: Adamts14, Col3a1, Col5a1, Col5a2, Dpt, Lox, and Anxa2, FDR = 1e-7)

ECM receptors: VLA proteins ( $\alpha 2$ ,  $\alpha 5$ ,  $\alpha 8$ ,  $\alpha 9$ ,  $\alpha 10$ ,  $\alpha 11$ ), cytoadhesins ( $\beta 3$ , A11- $\beta$ ), and proteoglycans (Cd44, Sdc3, Sv2), KEGG ECM-receptor interaction pathway, FDR =  $5.7e-7$

Angiogenesis genes: Col4a1, Col4a2, Robo4, Vash1, Sema5a, Sox18, GO:0001525, FDR =  $3.24e-14$

Muscle contraction and muscle system processes: Cacna1s, Myom1, Myh2, Myh4, Myh7, Nos1, Kcnma1, Ryr1, Trim63, FDR= $6.7e-4$  and  $1.6e-3$ , respectively.

Ossification regulation: Gpnmb, Bglap, Sparc, Spp1, Runx2, Bmp1, Bmp5, Smad1

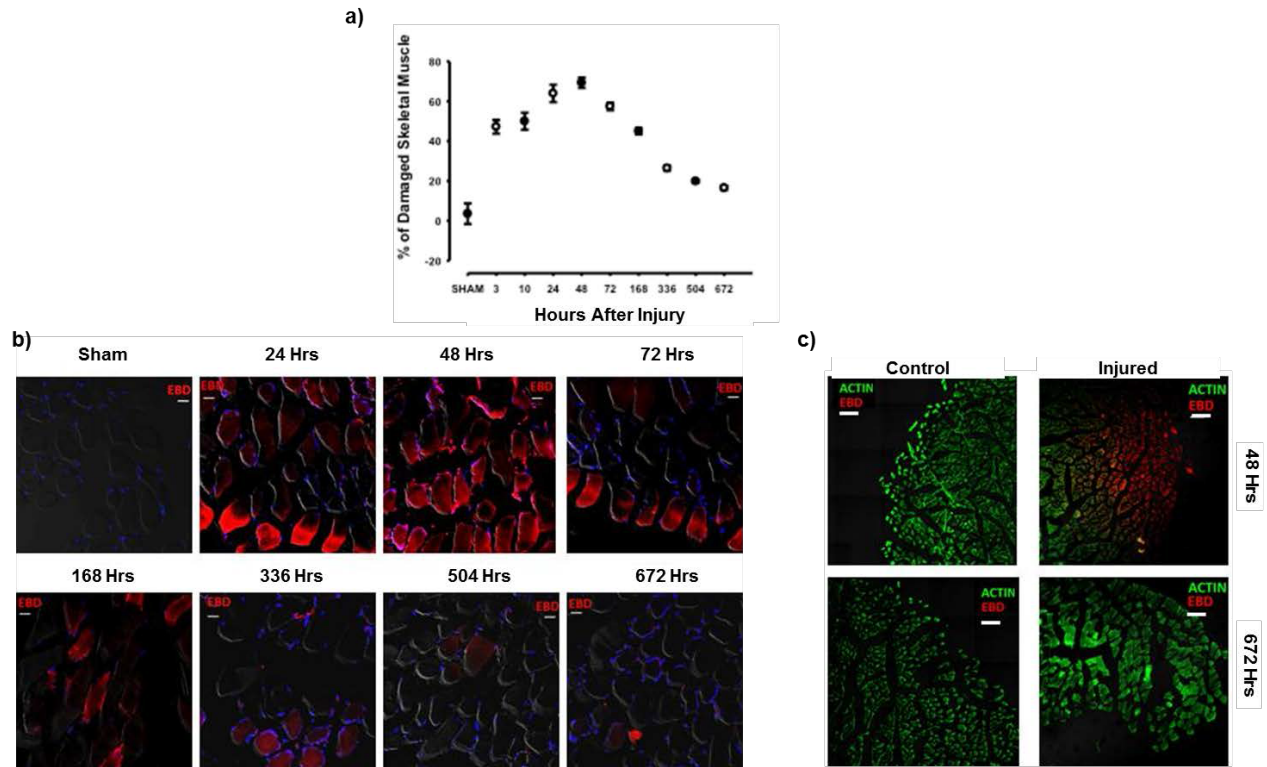

**Fig. S1.** Immuno-histological analysis of muscle after cryo-injury. a) Quantitative analysis of immuno-histological images revealed a gradual increase in tissue damage until 48 hours, indicating secondary damage to the muscle tissue occurred after the initial cryo-injury. b) Representative histological images of the injured TA stained with Evans Blue Dye (EBD – red) and DNA (blue) after several time points. c) Representative immuno-histological images at 48 hours and 672 hours after injury, whereby the green is stained for actin and red is stained for evans blue dye.

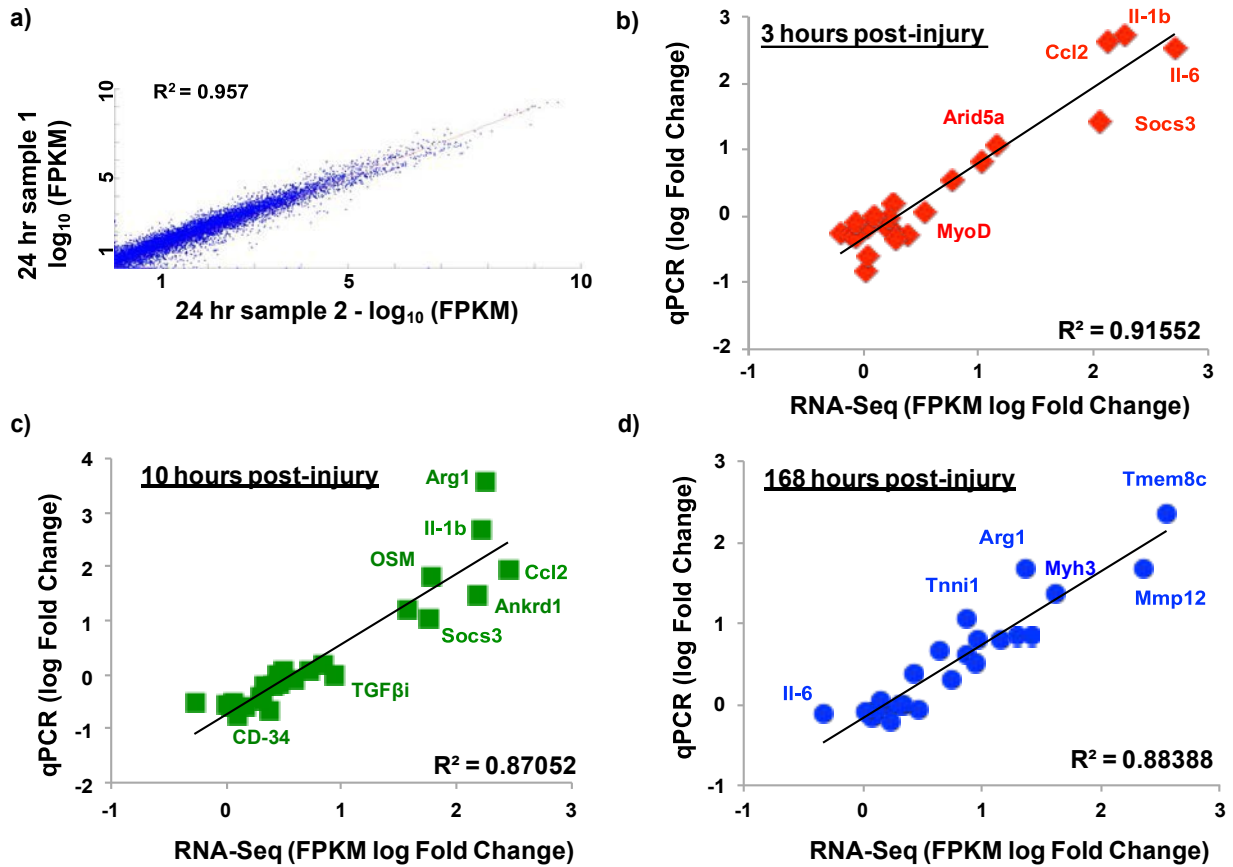

**Fig. S2.** a) Example of reproducibility from RNA-Seq datasets. Biological replicates of *in vivo* isolated RNA samples from 24 hours after injury. Sequencing libraries were prepared from the isolated RNA and a strong correlation ( $R^2 = 0.95$ ) was observed for two representative examples. b) Validation of RNA-Seq data with qPCR comparing the injured versus uninjured samples for the 3 hour time point. c) Validation of RNA-Seq data with qPCR comparing the injured versus uninjured samples for the 10 hour time point. d) Validation of RNA-Seq data with qPCR comparing the injured versus uninjured samples for the 168 hr time point.

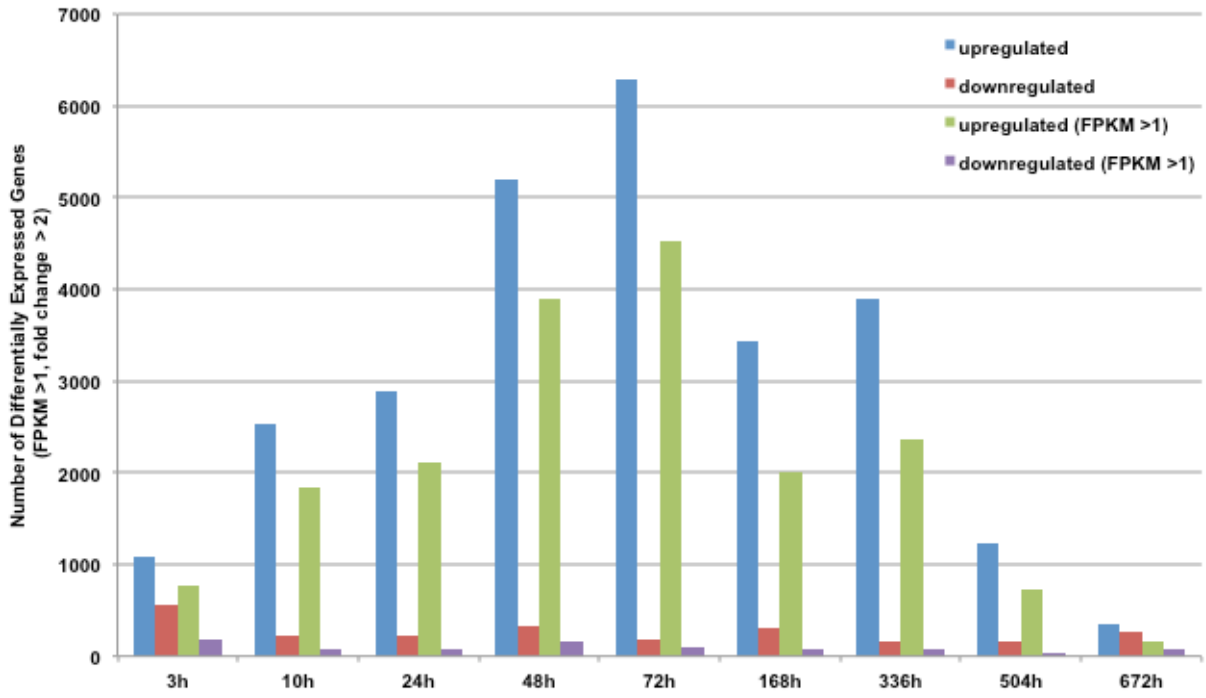

**Fig. S3.** Number of differentially expressed genes



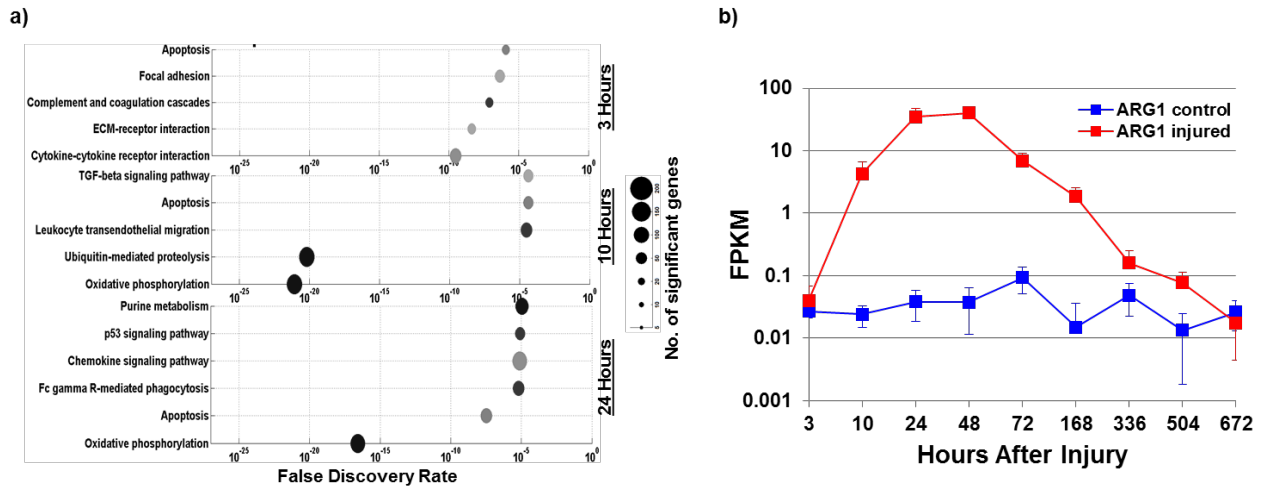

**Fig. S4.** Gene Sets Activated Early After Injury (3-24 hrs) a) Enriched KEGG pathways from differentially expressed genes for the early time points (3-24 hrs). The size of the circle corresponds to the number of significant genes with each enriched pathway. b) Heatmap of genes associated metabolism expressed in the early time period. c) Gene expression profile of Arginase 1 (Arg1), which is a molecule emitted by type 2 macrophages to balance inflammatory reactive-oxygen species present in the injured tissue. Red-Injured, Blue-Uninjured.

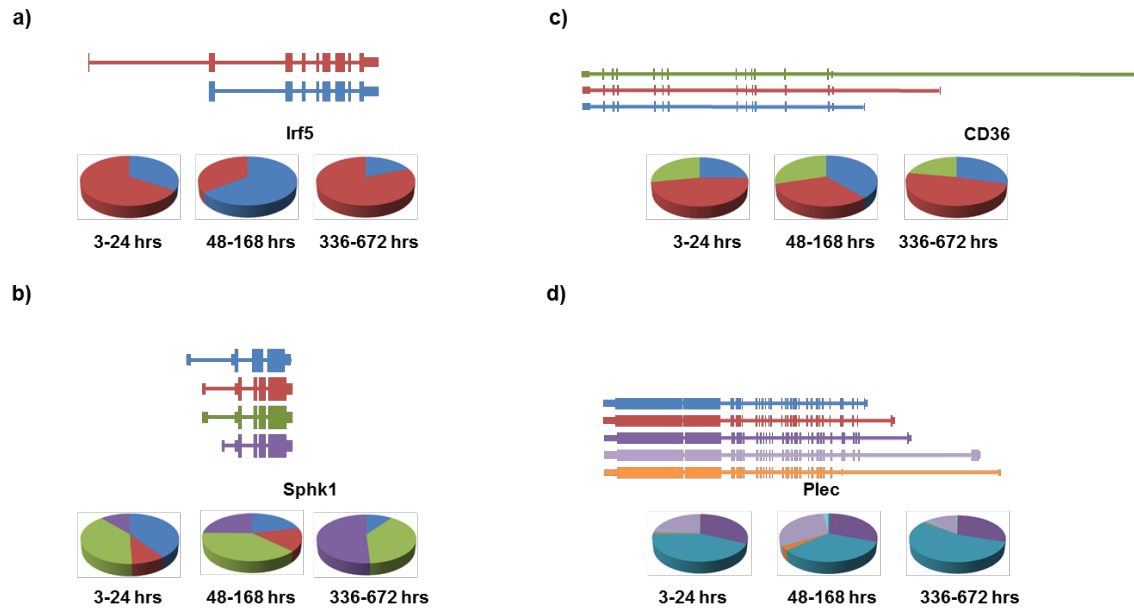

**Fig. S5.** Examples of alternative splicing in immune network of genes as determined by Cufflinks.

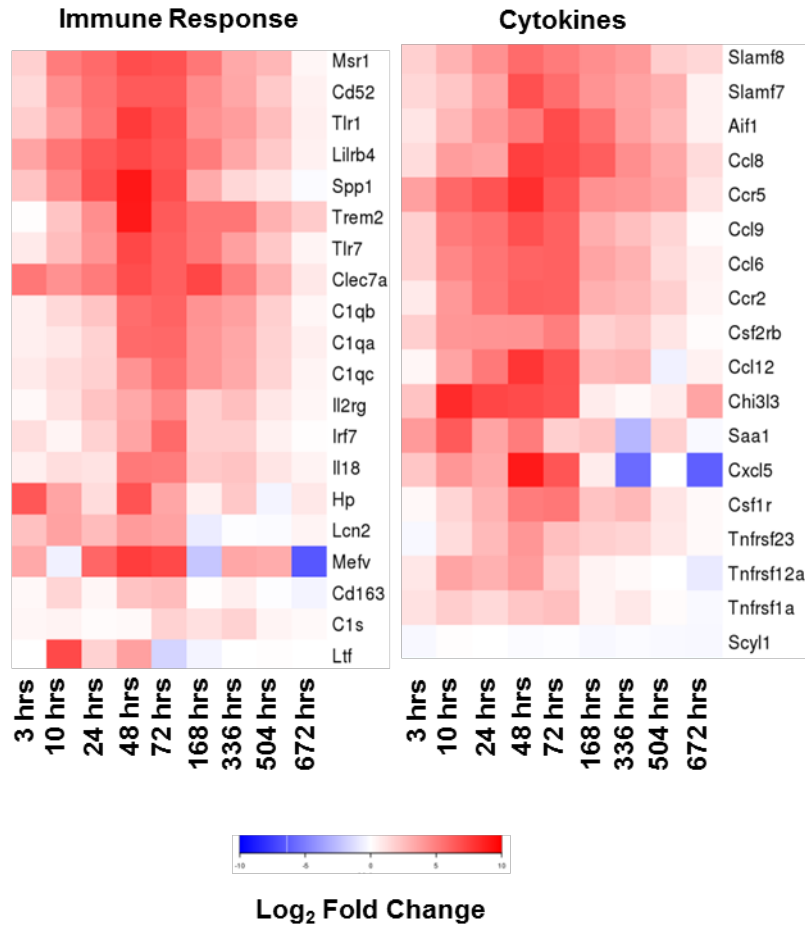

**Fig. S6.** Genes associated with hematopoietic activation, proliferation and anti-inflammatory cytokines activated in early & middle periods.

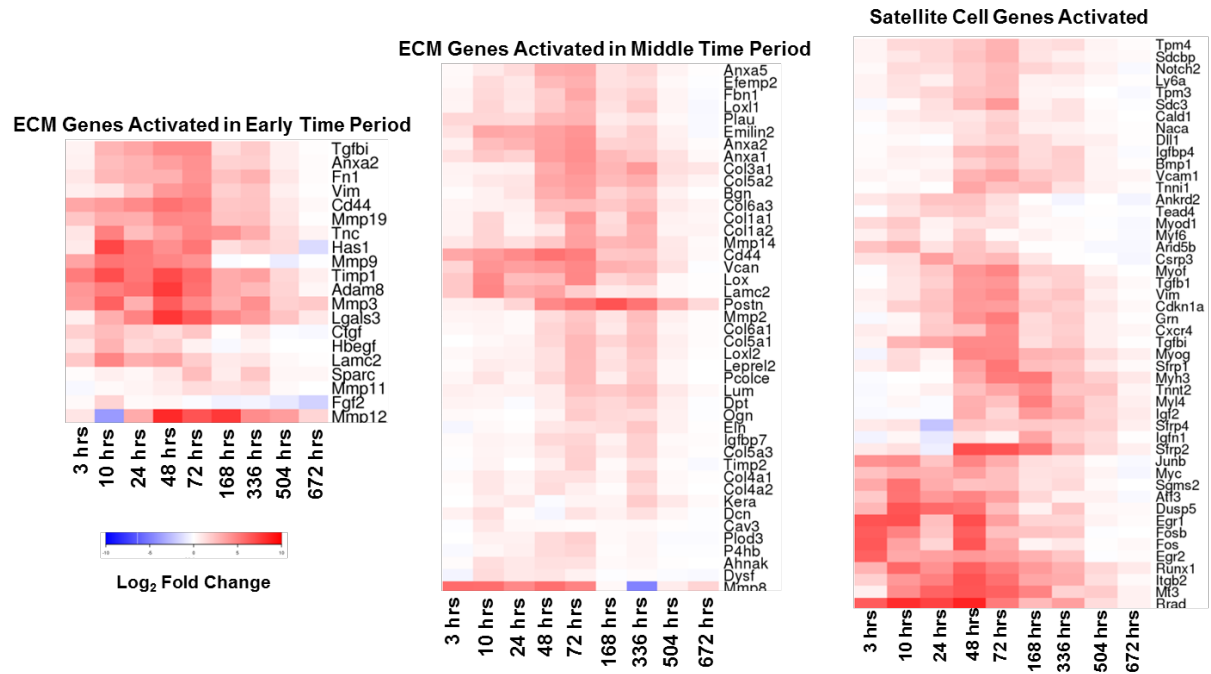

**Fig. S7.** Gene sets associated with extra-cellular matrix remodeling & satellite cell activation

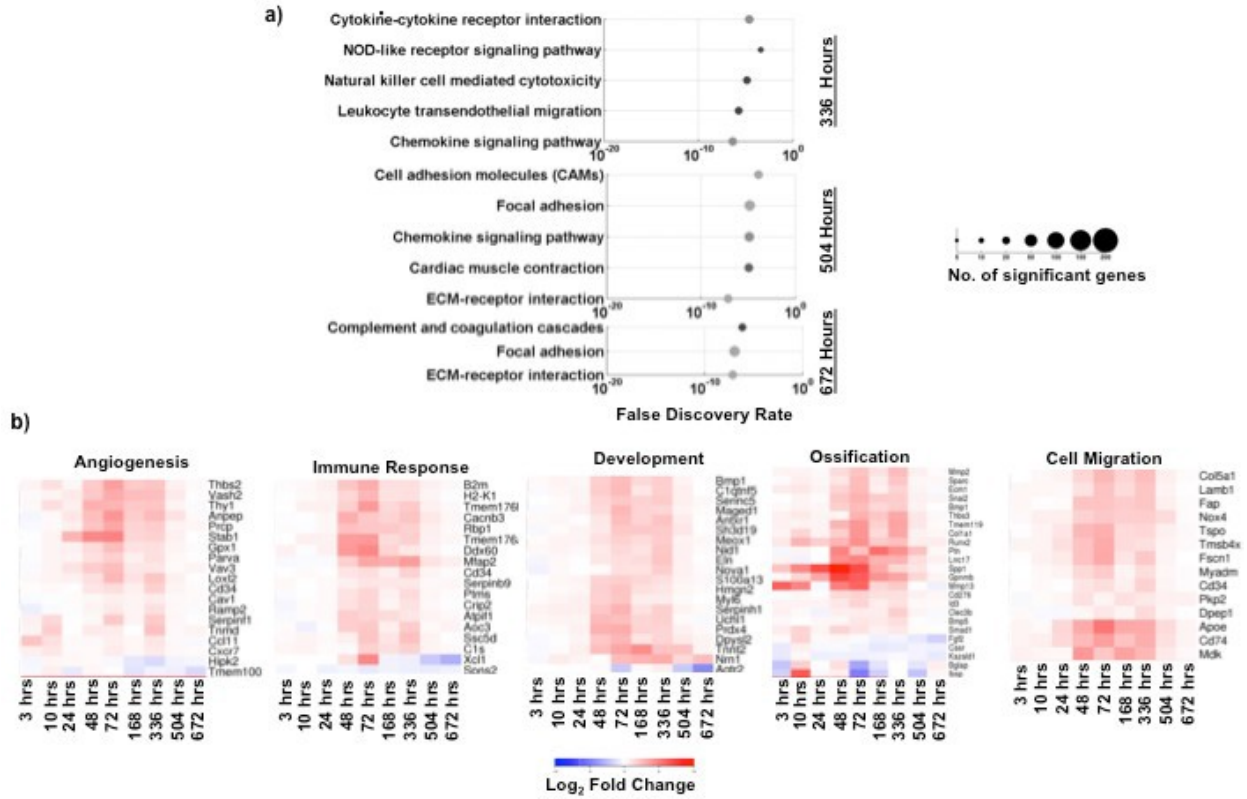

**Fig. S8.** a) Enriched KEGG pathways from differentially expressed genes for the late time points. The size of the circle corresponds to the number of significant genes with each enriched pathway. b) Heatmaps of gene sets activated in late period categorized by function.

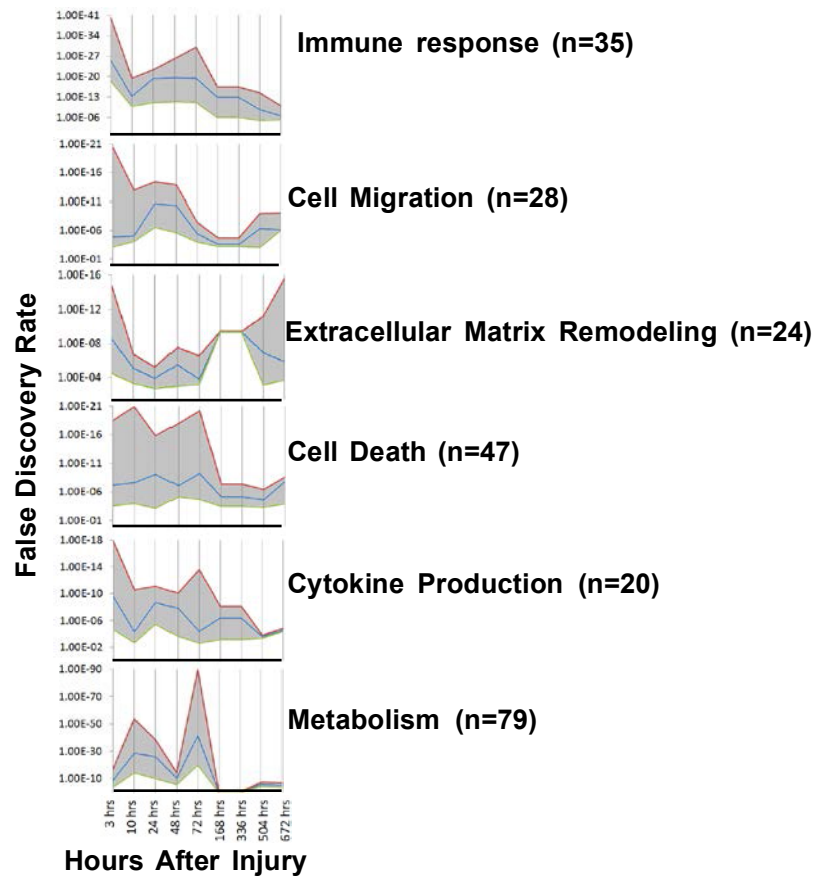

**Fig. S9.** Area plots of FDR values for Gene Annotation (GO) clusters over time. GO terms were separated into major functional categories, and the IQR was computed for the terms in each group. The grey lines indicate the 25<sup>th</sup> and 75<sup>th</sup> percentiles, red lines denote the 25% of gene FDR values, the blue line denotes the median FDR value, and the green line denotes the 75% for FDR.

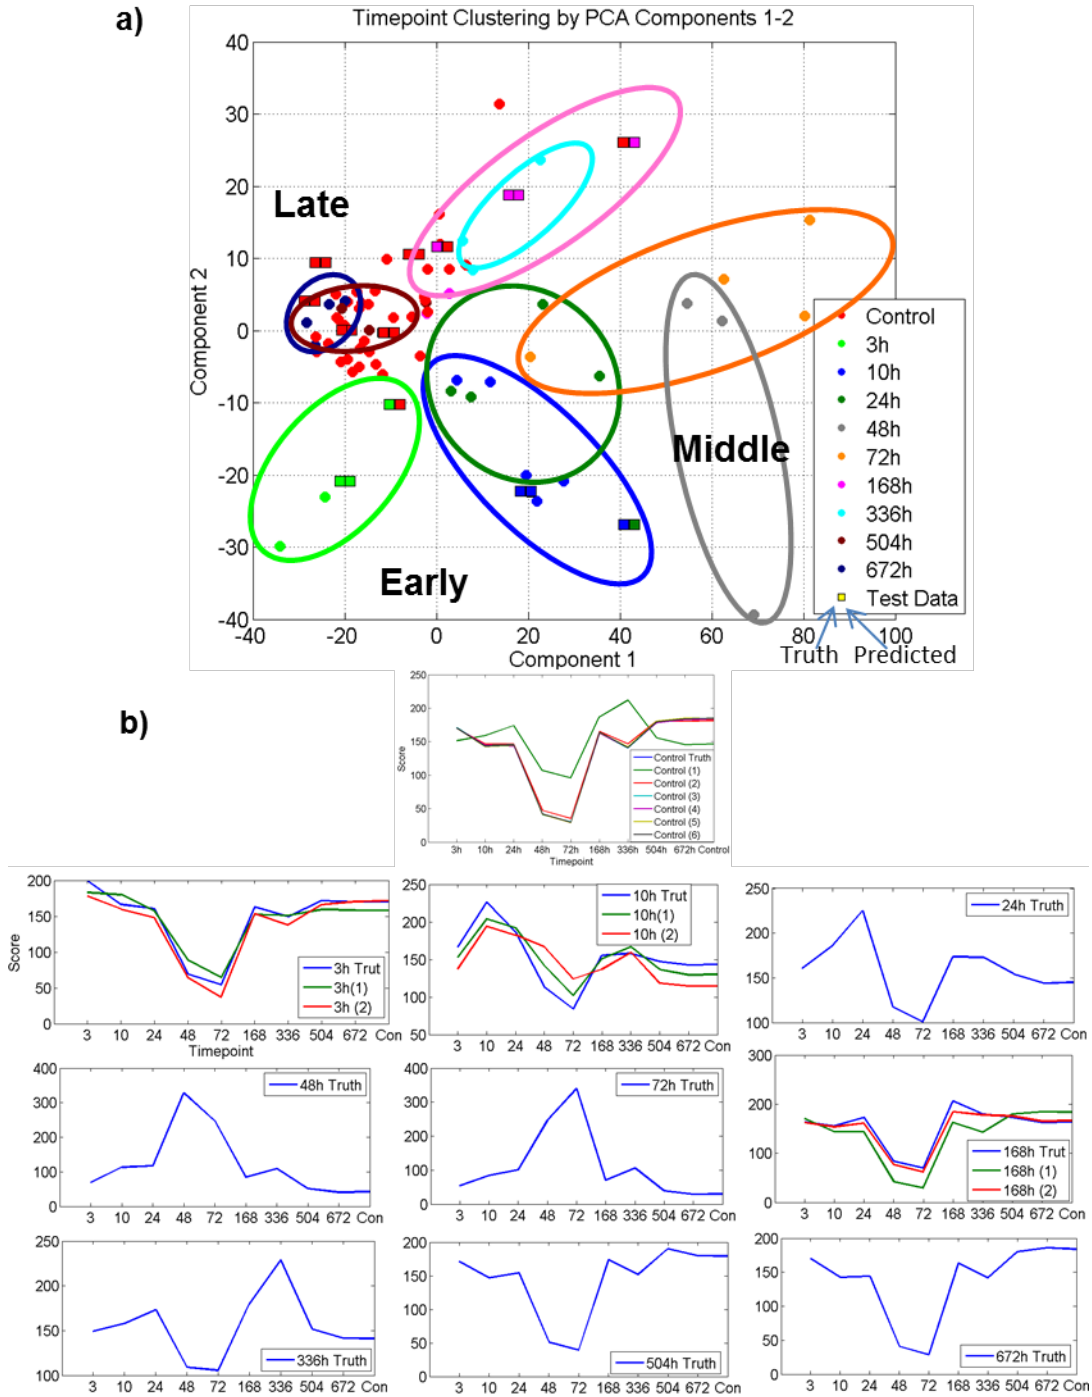

**Fig. S10.** Pathway-level scoring results for test datasets from PCA and the timepoint signatures methods. a) Principal component analysis. b) Normalized time point signatures method applied to mean pathway expression values. The top panel represents the timepoint signatures obtained for the uninjured control datasets for 6 test samples and a truth training sample. The green curve indicates the control sample that was misclassified by the algorithm at the pathway level. The next panels are derived from time point signatures for the 9 time points (blue lines) as well as 6 test samples (red and green lines).

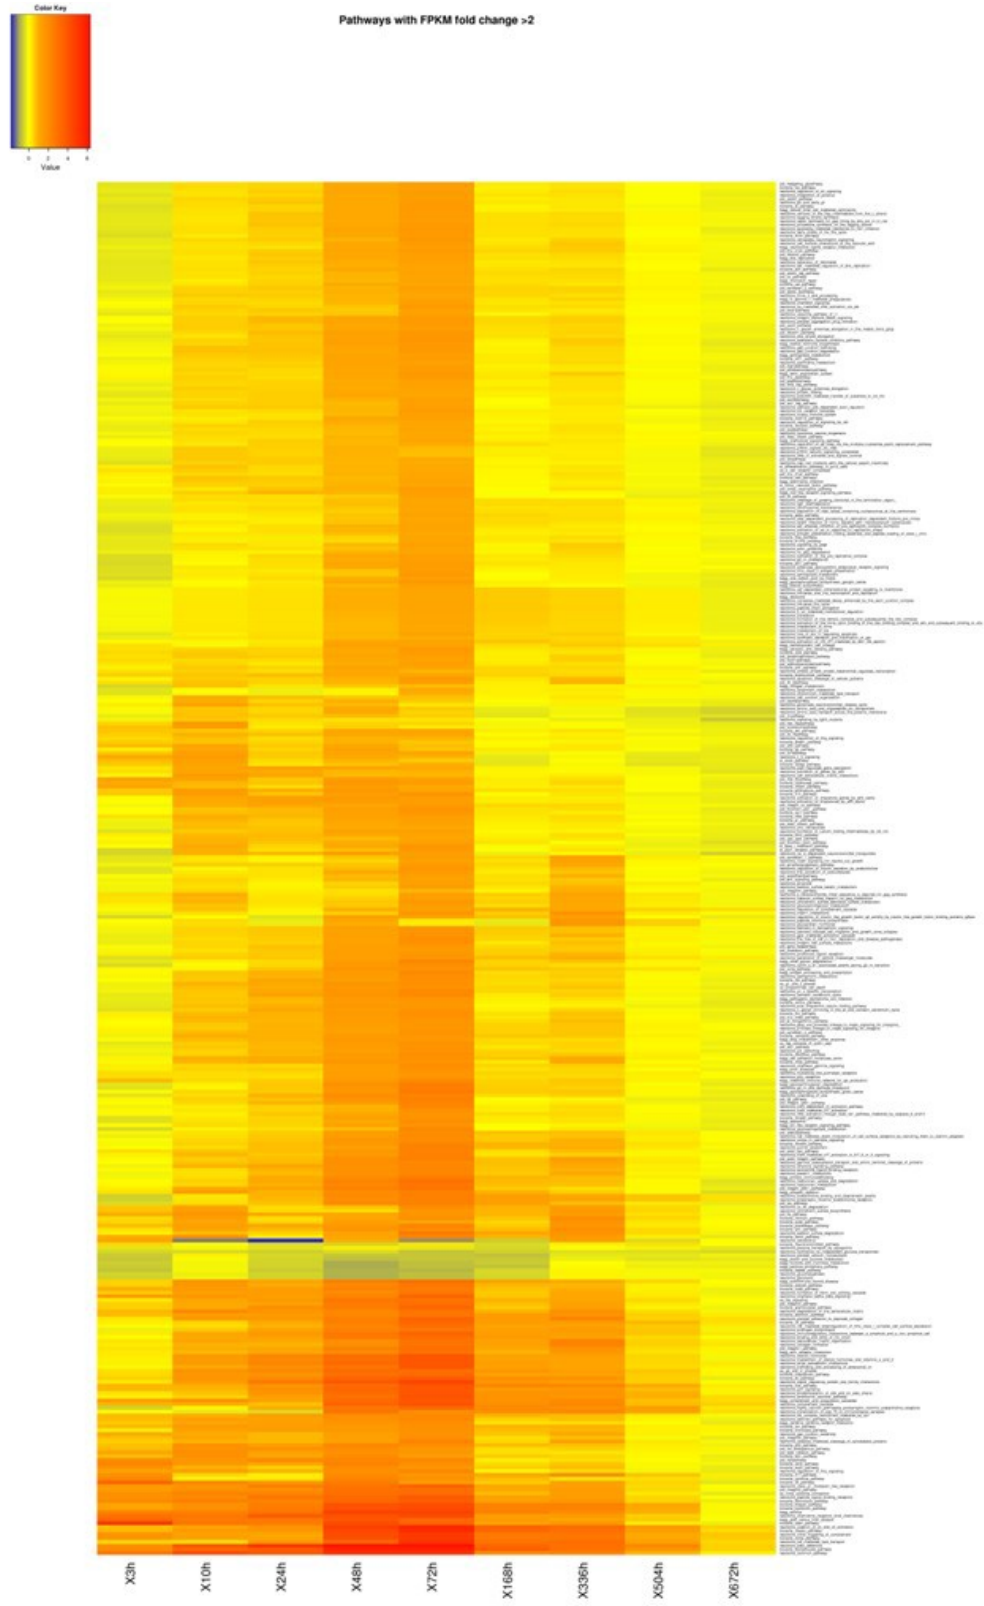

**Fig. S11.** Differentially expressed gene pathways in injured samples over time.







|                                |                                       |         |        |          |                                                                                                                                                                                                                                                                                                                                                                                                                                                                                                                                          |          |           |                 |            |             |      |             |
|--------------------------------|---------------------------------------|---------|--------|----------|------------------------------------------------------------------------------------------------------------------------------------------------------------------------------------------------------------------------------------------------------------------------------------------------------------------------------------------------------------------------------------------------------------------------------------------------------------------------------------------------------------------------------------------|----------|-----------|-----------------|------------|-------------|------|-------------|
| GOTERM_BP_FAT                  | GO:0007155~cell adhesion              | 76      | 7.01   | 5.20E-11 | PVR, NR2P, CADM3, ATP1B2, CLDN5, POSTN, DDR2, TGFBR2, CCRF1, CD44, CD93, CTGF, TGFBI, CSF3R, ZYX, ADAM8, COL1A2, BOC, CYR61, ICAM1, PDPN, PCOH47, MYH9, SRPA, BCL2L11, CD84, HES1, TNFAIP6, CD33, VCAN, LAMC2, DCBLD2, ITGAL, TNFRSF12A, TNC, NEDD9, ITGB2, SOX9, CDH4, ITGAM, ITGBL1, VCAM1, CD9, PVRL3, AGT, COMP, MYBPH, COL6A2, COL6A1, THBS1, SELPLG, THBS2, THBS3, FN1, THBS4, DPT, SPP1, COL18A1, PTPRC, SELP, SVEP1, TNXB, PLEK, SELL, PCDH12, NID1, ITGA3, ITGAA, EMLIN2, COL18A1, LAMA4, COL14A1, SNEI1, ITGAS, CLEC7A, BMPRI3 | 823      | 561       | 13588           | 2.24       | 1.57E-07    | 0.00 | 9.36E-08    |
| GOTERM_BP_FAT                  | GO:0022610~biological adhesion        | 76      | 7.01   | 5.65E-11 | PVR, NR2P, CADM3, ATP1B2, CLDN5, POSTN, DDR2, TGFBR2, CCRF1, CD44, CD93, CTGF, TGFBI, CSF3R, ZYX, ADAM8, COL1A2, BOC, CYR61, ICAM1, PDPN, PCOH47, MYH9, SRPA, BCL2L11, CD84, HES1, TNFAIP6, CD33, VCAN, LAMC2, DCBLD2, ITGAL, TNFRSF12A, TNC, NEDD9, ITGB2, SOX9, CDH4, ITGAM, ITGBL1, VCAM1, CD9, PVRL3, AGT, COMP, MYBPH, COL6A2, COL6A1, THBS1, SELPLG, THBS2, THBS3, FN1, THBS4, DPT, SPP1, COL18A1, PTPRC, SELP, SVEP1, TNXB, PLEK, SELL, PCDH12, NID1, ITGA3, ITGAA, EMLIN2, COL18A1, LAMA4, COL14A1, SNEI1, ITGAS, CLEC7A, BMPRI3 | 823      | 562       | 13588           | 2.23       | 1.70E-07    | 0.00 | 1.02E-07    |
| Annotation Cluster 8 Category  | Enrichment Score: 5.794336180757243   | Count % | PValue | Genes    | List Total                                                                                                                                                                                                                                                                                                                                                                                                                                                                                                                               | Pop Hits | Pop Total | Fold Enrichment | Bonferroni | Benjamini   | FDR  |             |
| GOTERM_MF_FAT                  | GO:0008009~chemokine activity         | 14      | 1.29   | 1.36E-07 | CXCL1, CCL3, CCL2, CXCL2, CXCL9, CCL8, PP4, CCL7, CCL6, CCL24, CCL11, CXCL14, PPPB, CXCL16                                                                                                                                                                                                                                                                                                                                                                                                                                               | 788      | 38        | 13288           | 6.21       | 1.16E-04    | 0.00 | 2.10E-04    |
| GOTERM_MF_FAT                  | GO:0042379~chemokine receptor binding | 14      | 1.29   | 1.93E-07 | CXCL1, CCL3, CCL2, CXCL2, CXCL9, CCL8, PP4, CCL7, CCL6, CCL24, CCL11, CXCL14, PPPB, CXCL16                                                                                                                                                                                                                                                                                                                                                                                                                                               | 788      | 39        | 13288           | 6.05       | 1.65E-04    | 0.00 | 2.99E-04    |
| Annotation Cluster 9 Category  | Enrichment Score: 5.746125904859628   | Count % | PValue | Genes    | List Total                                                                                                                                                                                                                                                                                                                                                                                                                                                                                                                               | Pop Hits | Pop Total | Fold Enrichment | Bonferroni | Benjamini   | FDR  |             |
| GOTERM_BP_FAT                  | GO:0006915~apoptosis                  | 56      | 5.17   | 1.28E-06 | RASSF5, CSRN1, CASP12, SULF1, APAF1, DRAM1, PDCD7                                                                                                                                                                                                                                                                                                                                                                                                                                                                                        | 823      | 465       | 13588           | 1.99       | 0.003849547 | 0.00 | 0.002303428 |
| GOTERM_BP_FAT                  | GO:0016265~death                      | 60      | 5.54   | 1.93E-06 | NUAK2, NFKB1, CXCR2, TGFBR2, SHB, TMEM173, CASP4, BAG3, CASP8, FAS, CASP1, MYC, BCL10, LTBR, NLRP3, BCL2L11, DDIT4, OSM, TNFRSF10B, RIPK1, GADD45G, RIPK3, TNFAIP3, EIF2AK2, GADD45B, PPP1R15A, PEG3, MCL1, LITAF, TNFRSF12A, PML, STK17B, ARF6, IRAK3, TNFRSF1A, PRUNE2, IRAK3, PEG10, COMP, MAP3K1, SHSAS, ZC3H12A, FGL2, INPP5D, SRGN, PHLDA1, CFLAR, ACTC1, BIRC3, NFKB1L1, CIDEC, NRAA2, BIRC3, NFKB1L1, CIDEC, RASSF5, CSRN1, SULF1, CASP12, APAF1, DRAM1, PDCD7                                                                   | 823      | 519       | 13588           | 1.91       | 0.005805099 | 0.00 | 0.003476951 |
| GOTERM_BP_FAT                  | GO:0008219~cell death                 | 59      | 5.44   | 1.93E-06 | NUAK2, NFKB1, CXCR2, TGFBR2, SHB, TMEM173, CASP4, BAG3, CASP8, FAS, CASP1, MYC, BCL10, LTBR, NLRP3, BCL2L11, DDIT4, OSM, TNFRSF10B, RIPK1, GADD45G, RIPK3, TNFAIP3, EIF2AK2, GADD45B, PPP1R15A, PEG3, MCL1, LITAF, TNFRSF12A, PML, STK17B, ARF6, IRAK3, TNFRSF1A, PRUNE2, IRAK3, PEG10, COMP, MAP3K1, SHSAS, ZC3H12A, FGL2, INPP5D, SRGN, PHLDA1, CFLAR, LY2Z, ACTC1, BIRC3, NFKB1L1, CIDEC, RASSF5, CSRN1, SULF1, CASP12, APAF1, DRAM1, PDCD7                                                                                           | 823      | 507       | 13588           | 1.92       | 0.005808084 | 0.00 | 0.003478744 |
| GOTERM_BP_FAT                  | GO:0012501~programmed cell death      | 56      | 5.17   | 2.18E-06 | NUAK2, NFKB1, CXCR2, TGFBR2, SHB, TMEM173, CASP4, BAG3, CASP8, FAS, CASP1, MYC, BCL10, LTBR, NLRP3, BCL2L11, DDIT4, OSM, TNFRSF10B, RIPK1, GADD45G, RIPK3, TNFAIP3, EIF2AK2, GADD45B, PPP1R15A, PEG3, MCL1, LITAF, TNFRSF12A, PML, STK17B, ARF6, IRAK3, TNFRSF1A, PRUNE2, IRAK3, PEG10, COMP, MAP3K1, SHSAS, ZC3H12A, FGL2, INPP5D, SRGN, PHLDA1, CFLAR, ACTC1, BIRC3, NFKB1L1, CIDEC, RASSF5, CSRN1, CASP12, SULF1, APAF1, DRAM1, PDCD7                                                                                                 | 823      | 473       | 13588           | 1.95       | 0.006542704 | 0.00 | 0.003920182 |
| Annotation Cluster 10 Category | Enrichment Score: 4.535473351581223   | Count % | PValue | Genes    | List Total                                                                                                                                                                                                                                                                                                                                                                                                                                                                                                                               | Pop Hits | Pop Total | Fold Enrichment | Bonferroni | Benjamini   | FDR  |             |
| GOTERM_BP_FAT                  | GO:0010941~regulation of cell death   | 66      | 6.09   | 3.28E-07 | NUAK2, FOXO1, PNP, TGFBR2, BDNF, CASP4, APOE, BAG3, HMOX1, CHST11, CASP8, FAS, CASP1, MYC, BCL10, PM1, NLRP3, BCL2L11, ADRB2, HIF1A, TNFRSF10B, BTG2, BTG1, RIPK3, IFIH1, FGFRL3, MCL1, PML, STK17B, HSPA1A, HSPA1B, NR3C1, SOX9, CD74, ADA, GCHI, IRAK3, ALDH3A3, AGT, SHSAS, BCL3, FCER1G, INPP5D, SKI1, ANGPTL4, SPP1, BMP4, COL18A1, CFLAR, PTPRC, PTPN6, KLF10, TGFBR1, SPHK1, NRAA2, BIRC3, NFKB1L1, FCGR3, CIDEC, NOTCH2, CDKN1A, NUPR1, CASP12, APAF1, ID3, PDCD7, IFI204                                                        | 823      | 563       | 13588           | 1.94       | 9.88E-04    | 0.00 | 5.91E-04    |
| GOTERM_BP_FAT                  | GO:0042081~regulation of apoptosis    | 65      | 6.00   | 3.70E-07 | NUAK2, FOXO1, PNP, TGFBR2, BDNF, CASP4, APOE, BAG3, HMOX1, CHST11, CASP8, FAS, CASP1, MYC, BCL10, PM1, NLRP3, BCL2L11, ADRB2, HIF1A, TNFRSF10B, BTG2, BTG1, RIPK3, IFIH1, FGFRL3, MCL1, PML, STK17B, HSPA1A, HSPA1B, NR3C1, SOX9, CD74, ADA, GCHI, IRAK3, ALDH3A3, AGT, SHSAS, BCL3, FCER1G, INPP5D, SKI1, ANGPTL4, SPP1, COL18A1, CFLAR, PTPRC, PTPN6, KLF10, TGFBR1, SPHK1, NRAA2, BIRC3, NFKB1L1, FCGR3, CIDEC, NOTCH2, CDKN1A, NUPR1, CASP12, APAF1, ID3, PDCD7, IFI204                                                              | 823      | 553       | 13588           | 1.94       | 0.001115723 | 0.00 | 6.67E-04    |









|               |            |                                                                                           |     |      |          |                                                                                                                                                                                                                                                                                                                                                                                                                                                                                                                                                                                                                                                                                                                                                                                                                                              |      |     |       |      |          |          |          |
|---------------|------------|-------------------------------------------------------------------------------------------|-----|------|----------|----------------------------------------------------------------------------------------------------------------------------------------------------------------------------------------------------------------------------------------------------------------------------------------------------------------------------------------------------------------------------------------------------------------------------------------------------------------------------------------------------------------------------------------------------------------------------------------------------------------------------------------------------------------------------------------------------------------------------------------------------------------------------------------------------------------------------------------------|------|-----|-------|------|----------|----------|----------|
| GOTERM_BP_FAT | GO:0051173 | positive regulation of nitrogen compound metabolic process                                | 121 | 4.22 | 2.33E-06 | MYO01, THRB, TGF03, TLK2, TLK4, PNP, TGF01, CTED2, KDM1A, MYO08, TRP63, RARA, RARB, BCL10, REL, SIK2, ARNTL, SIK4, MED13, PPARGC1B, PTH4, HOKD9, HIF1A, ZFP462, JUN, VEGFA, SIK1, VGLL2, NFE2L2, FUS, HMGB2, ADORA2B, CYTL1, SOX4, ITGB2, SFP11, SOX9, PLAGL1, SLC11A1, TEAD4, AGRN, RUNX1, RUNX2, TRP53, BMP4, KLF5, KLF6, BMP2, ESRRB, EPAS1, IZFP1, MAFB, MAML1, SMAD5, CREBBP, NR4A2, ESRG, NR4A1, SMAD3, SMAD1, NR4A3, KLF15, TEAD3, SREBF2, ATF4, SALL4, EAF1, CSRN1P, KLF2, KLF4, PPARA, CHURC1, FOXK1, ELF4, FOS, SDFR, GUCY1A3, YAP1, MYC, FGF2, RHOG, SERTAD1, EGR1, AR, EGR2, HSP90AA1, TOPORS, HMGA1, SMO, MURC, CAND1, FOXC1, INGS, ABLUM2, GLI2, ABLUM3, NUPFP1, PRDM16, TNFRSF1A, REL, NFAT3, BCL3, MYOG, PTK3, CEPBA, BCKDHA, MYF6, PTPRC, IL6, CEPBB, CEPBD, TBX1, AFF1, STAT3, IRF8, IRF1, PPK1, RBM14, RBM15, NFIA, ARAP1 | 2080 | 526 | 13588 | 1.50 | 9.57E-03 | 2.67E-04 | 4.34E-03 |
| GOTERM_BP_FAT | GO:0045941 | positive regulation of transcription from RNA polymerase II promoter                      | 89  | 3.10 | 2.36E-06 | MYO01, THRB, TGF03, TGF01, CTED2, KDM1A, MYO08, TRP63, RARA, RARB, BCL10, REL, SIK2, ARNTL, SIK4, MED13, PPARGC1B, HOKD9, HIF1A, ZFP462, JUN, VEGFA, SIK1, VGLL2, NFE2L2, FUS, HMGB2, CYTL1, SOX4, SFP11, SOX9, PLAGL1, SLC11A1, TNFRSF1A, TEAD4, NFAT3, BCL3, MYOG, AGRN, RUNX1, RUNX2, BMP4, CEPBA, TRP53, KLF6, BMP2, ESRRB, IL6, CEPBB, IZFP1, EPAS1, MAFB, CEPBD, MAML1, CREBBP, SMAD5, NR4A2, SMAD3, NR4A1, TBX1, NR4A3, SMAD1, TEAD3, SREBF2, ATF4, SALL4, EAF1, CSRN1P, IRF1, PPK1, RBM14, RBM15, NFIA, ARAP1                                                                                                                                                                                                                                                                                                                        | 2080 | 358 | 13588 | 1.62 | 9.72E-03 | 2.64E-04 | 4.41E-03 |
| GOTERM_BP_FAT | GO:0045941 | positive regulation of transcription                                                      | 111 | 3.87 | 2.96E-06 | MYO01, THRB, TGF03, TGF01, CTED2, KDM1A, MYO08, TRP63, RARA, RARB, BCL10, REL, SIK2, ARNTL, SIK4, MED13, PPARGC1B, HOKD9, HIF1A, ZFP462, JUN, VEGFA, SIK1, VGLL2, NFE2L2, FUS, HMGB2, CYTL1, SOX4, SFP11, SOX9, PLAGL1, SLC11A1, TEAD4, AGRN, RUNX1, RUNX2, TRP53, BMP4, KLF5, KLF6, ESRB, BMP2, EPAS1, IZFP1, MAFB, MAML1, SMAD5, CREBBP, NR4A2, ESRG, NR4A1, SMAD3, SMAD1, NR4A3, KLF15, TEAD3, SREBF2, ATF4, SALL4, EAF1, CSRN1P, KLF2, KLF4, PPARA, CHURC1, FOXK1, ELF4, FOS, SDFR, YAP1, FGF2, MYC, RHOG, SERTAD1, EGR1, AR, EGR2, TOPORS, HMGA1, SMO, MURC, CAND1, FOXC1, INGS, ABLUM2, ABLUM1, GLI2, NUPFP1, PRDM16, TNFRSF1A, REL, NFAT3, BCL3, MYOG, CEPBA, BCKDHA, MYF6, IL6, CEPBB, CEPBD, TBX1, AFF1, STAT3, IRF8, IRF1, PPK1, RBM14, RBM15, NFIA, ARAP1                                                                         | 2080 | 475 | 13588 | 1.53 | 1.21E-02 | 2.98E-04 | 5.52E-03 |
| GOTERM_BP_FAT | GO:0010628 | positive regulation of gene expression                                                    | 113 | 3.94 | 3.77E-06 | MYO01, THRB, TGF03, TGF01, CTED2, KDM1A, MYO08, TRP63, RARA, RARB, BCL10, REL, SIK2, ARNTL, SIK4, MED13, PPARGC1B, HOKD9, HIF1A, ZFP462, JUN, VEGFA, SIK1, VGLL2, NFE2L2, FUS, HMGB2, CYTL1, SOX4, SFP11, SOX9, PLAGL1, SLC11A1, TEAD4, AGRN, RUNX1, RUNX2, TRP53, BMP4, KLF5, KLF6, ESRB, BMP2, EPAS1, IZFP1, MAFB, MAML1, SMAD5, CREBBP, NR4A2, ESRG, NR4A1, SMAD3, SMAD1, NR4A3, KLF15, TEAD3, SREBF2, ATF4, SALL4, EAF1, CSRN1P, KLF2, KLF4, PPARA, CHURC1, FOXK1, ELF4, FOS, SDFR, YAP1, MYC, FGF2, RHOG, SERTAD1, EGR1, AR, EGR2, TOPORS, HMGA1, SMO, MURC, CAND1, FOXC1, INGS, ABLUM2, ABLUM1, GLI2, NUPFP1, PRDM16, TNFRSF1A, REL, NFAT3, BCL3, MYOG, CEPBA, BCKDHA, MYF6, IL6, CEPBB, CEPBD, TBX1, AFF1, STAT3, IRF8, IRF1, PPK1, RBM14, RBM15, NFIA, ARAP1                                                                         | 2080 | 488 | 13588 | 1.51 | 1.54E-02 | 3.38E-04 | 7.02E-03 |
| GOTERM_BP_FAT | GO:0006357 | regulation of transcription from RNA polymerase II promoter                               | 136 | 4.74 | 5.27E-06 | MYO01, THRB, TGF03, TGF01, CTED2, KDM1A, MYO08, TRP63, RARA, RARB, BCL10, REL, SIK2, ARNTL, SIK4, MED13, PPARGC1B, HOKD9, HIF1A, ZFP462, JUN, VEGFA, SIK1, VGLL2, NFE2L2, FUS, HMGB2, ADORA2B, CYTL1, SOX4, SFP11, SOX9, PLAGL1, SLC11A1, TEAD4, AGRN, RUNX1, RUNX2, TRP53, BMP4, KLF5, KLF6, ESRB, BMP2, EPAS1, IZFP1, MAFB, MAML1, SMAD5, CREBBP, NR4A2, ESRG, NR4A1, SMAD3, SMAD1, NR4A3, KLF15, TEAD3, SREBF2, ATF4, SALL4, EAF1, CSRN1P, KLF2, KLF4, PPARA, CHURC1, FOXK1, ELF4, FOS, SDFR, YAP1, MYC, FGF2, RHOG, SERTAD1, EGR1, AR, EGR2, TOPORS, HMGA1, SMO, MURC, CAND1, FOXC1, INGS, ABLUM2, ABLUM1, GLI2, NUPFP1, PRDM16, TNFRSF1A, REL, NFAT3, BCL3, MYOG, CEPBA, BCKDHA, MYF6, IL6, CEPBB, CEPBD, TBX1, AFF1, STAT3, IRF8, IRF1, PPK1, RBM14, RBM15, NFIA, ARAP1                                                                | 2080 | 616 | 13588 | 1.44 | 2.15E-02 | 4.10E-04 | 9.82E-03 |
| GOTERM_BP_FAT | GO:0045935 | positive regulation of nucleobase, nucleoside, nucleotide and nucleic acid metabolic proc | 116 | 4.04 | 6.74E-06 | MYO01, THRB, TGF03, TGF01, CTED2, KDM1A, MYO08, TRP63, RARA, RARB, BCL10, REL, SIK2, ARNTL, SIK4, MED13, PPARGC1B, PTH4, HOKD9, HIF1A, ZFP462, JUN, VEGFA, SIK1, VGLL2, NFE2L2, FUS, HMGB2, ADORA2B, CYTL1, SOX4, SFP11, SOX9, PLAGL1, SLC11A1, TEAD4, AGRN, RUNX1, RUNX2, TRP53, BMP4, KLF5, KLF6, ESRB, BMP2, EPAS1, IZFP1, MAFB, MAML1, SMAD5, CREBBP, NR4A2, ESRG, NR4A1, SMAD3, SMAD1, NR4A3, KLF15, TEAD3, SREBF2, ATF4, SALL4, EAF1, CSRN1P, KLF2, KLF4, PPARA, CHURC1, FOXK1, ELF4, FOS, SDFR, YAP1, MYC, FGF2, RHOG, SERTAD1, EGR1, AR, EGR2, TOPORS, HMGA1, SMO, MURC, CAND1, FOXC1, INGS, ABLUM2, ABLUM1, GLI2, NUPFP1, PRDM16, TNFRSF1A, REL, NFAT3, BCL3, MYOG, CEPBA, BCKDHA, MYF6, PTPRC, IL6, CEPBB, CEPBD, TBX1, AFF1, STAT3, IRF8, IRF1, PPK1, RBM14, RBM15, NFIA, ARAP1                                                   | 2080 | 510 | 13588 | 1.49 | 2.74E-02 | 5.06E-04 | 1.26E-02 |
| GOTERM_BP_FAT | GO:0010557 | positive regulation of macromolecule biosynthetic process                                 | 119 | 4.15 | 9.65E-06 | MYO01, THRB, TGF03, TGF01, CTED2, KDM1A, MYO08, TRP63, RARA, RARB, BCL10, REL, SIK2, ARNTL, SIK4, MED13, PPARGC1B, HOKD9, HIF1A, ZFP462, JUN, VEGFA, SIK1, VGLL2, NFE2L2, FUS, HMGB2, ADORA2B, CYTL1, SOX4, SFP11, SOX9, PLAGL1, SLC11A1, TEAD4, AGRN, RUNX1, RUNX2, TRP53, BMP4, KLF5, KLF6, ESRB, BMP2, EPAS1, IZFP1, MAFB, MAML1, SMAD5, CREBBP, NR4A2, ESRG, NR4A1, SMAD3, SMAD1, NR4A3, KLF15, TEAD3, SREBF2, ATF4, SALL4, EAF1, CSRN1P, KLF2, KLF4, PPARA, CHURC1, FOXK1, ELF4, FOS, SDFR, YAP1, MYC, FGF2, RHOG, SERTAD1, EGR1, AR, EGR2, TOPORS, HMGA1, SMO, MURC, CAND1, FOXC1, EFS2, SERP1, INGS, ABLUM2, GLI2, ABLUM3, NUPFP1, PRDM16, TNFRSF1A, REL, NFAT3, BCL3, MYOG, CEPBA, BCKDHA, MYF6, IL6, CEPBB, CEPBD, TBX1, AFF1, STAT3, IRF8, IRF1, PPK1, RBM14, RBM15, NFIA, ARAP1                                                   | 2080 | 530 | 13588 | 1.47 | 3.91E-02 | 6.87E-04 | 1.80E-02 |





| Gene          | Accession  | Protein                       | Start | End   | Score    | E-value | Score    | E-value  | Score    | E-value |
|---------------|------------|-------------------------------|-------|-------|----------|---------|----------|----------|----------|---------|
| GOTERM_MF_FAT | GO:0032557 | purine ribonucleotide binding | 356   | 12.46 | 4.82E-11 | 1.36    | 6.82E-08 | 1.70E-08 | 7.95E-08 |         |
| GOTERM_MF_FAT | GO:0000169 | nucleotide binding            | 413   | 14.46 | 7.12E-11 | 1.30    | 1.01E-06 | 1.68E-07 | 1.17E-06 |         |
| GOTERM_MF_FAT | GO:0030054 | adenyl nucleotide binding     | 295   | 10.33 | 9.02E-08 | 1.32    | 1.28E-04 | 1.59E-05 | 1.49E-04 |         |
| GOTERM_MF_FAT | GO:0001883 | purine nucleotide binding     | 296   | 10.36 | 1.32E-07 | 1.31    | 1.87E-04 | 1.70E-05 | 2.74E-04 |         |







IQGAP2, ARHGAP15, TBC1D19, IQGAP1, TBC1D16, HMMH1, ARHGAP22, ARHGAP20, RINI, TIAM2,  
ARHGAP1, RANBP1, ARHGAP11A, ARHGAP9, SCS, ARHGAP28, SIPA1L1, TWI1, ARHGAP25, ARHGAP30,  
ACAP1, RINI, RIN3, ARFGAP2, ARHGAP2, ARFGAP3, RAPIGAP, TBC1D9, GFSM3, SIPA1, MYO9B,  
FAM138, ADAP1, DOCK2, RGS12, GMP, GFSM1, RASA3, ARHGDA, ARHGDB, TBC1D2, TBC1D2B,  
TBC1D10C, ABR, TBC1D10A, RGS18, RGS16, RACGAP1, RGS14, USPNL, ADAP2, RGS2, CHML, GRTF1,

GOTERM\_MF\_FAT GO:0005096-GTPase activator activity

56 1.96

3.05E-07 SH3BP1, ARAP1

1935 192 13288

2.00 4.32E-04

2.70E-05

5.03E-04









| Annotation Cluster 19 | Enrichment Score: 3.3671298805420657                              | Count                                                                                                                                                                                 | %    | PValue   | Genes                                                                                                                                                                                                                                                                                                                                                                                                                                                                                                                                                   | List Total | Pop Hits | Pop Total | Fold Enrichment | Bonferroni | Benjamini | FDR      |
|-----------------------|-------------------------------------------------------------------|---------------------------------------------------------------------------------------------------------------------------------------------------------------------------------------|------|----------|---------------------------------------------------------------------------------------------------------------------------------------------------------------------------------------------------------------------------------------------------------------------------------------------------------------------------------------------------------------------------------------------------------------------------------------------------------------------------------------------------------------------------------------------------------|------------|----------|-----------|-----------------|------------|-----------|----------|
| GOTERM_MF_FAT         | GO:0016791~phosphatase activity                                   | 50                                                                                                                                                                                    | 2.32 | 2.99E-05 | PP1PSK2, PGAM1, PTPN22, PGAM2, PPP5K1, NTSC, PTPRL, PPP2C2, FBP2, PPP3B3A, LPIN2, PTPRO, LPIN3, PPM3A, PPM1L, PPM3A, PPM3B, NTSCLA, RBCK333ZORR, PPK3E1, PPM3A, AC2, PTP2B, PPK3C, PPK3CA, NPFSO, PPTC7, PTPN7, PTPN6, PTPN8, PTPN9, PTPN18, PTPN3, PTPN4, PTPR4, EPM2A, EPHK2, DUSP23, ATP1A1, BPGM, PTPN12, DUSP5, DUSP4, DUSP28, PTP4A3, DUSP26, PTPN1, PMPRT1, DUSP8, DUSP6                                                                                                                                                                         | 1524       | 238      | 13288     | 1.83            | 3.77E-02   | 1.54E-03  | 4.88E-02 |
| Annotation Cluster 25 | Enrichment Score: 2.4724967356094183                              | Count <th>%</th> <th>PValue</th> <th>Genes</th> <th>List Total</th> <th>Pop Hits</th> <th>Pop Total</th> <th>Fold Enrichment</th> <th>Bonferroni</th> <th>Benjamini</th> <th>FDR</th> | %    | PValue   | Genes                                                                                                                                                                                                                                                                                                                                                                                                                                                                                                                                                   | List Total | Pop Hits | Pop Total | Fold Enrichment | Bonferroni | Benjamini | FDR      |
| GOTERM_BP_FAT         | GO:0006631~fatty acid metabolic process                           | 48                                                                                                                                                                                    | 2.23 | 1.46E-05 | MHO5A, PINKA3, SLC71A1, PPARA, ACOY1, ACAD8, ECH1, CPT2, STAT5B, NDUFA8, ECHS1, CD74, HADHA, HADHB, SC4MDL, FAB1, ELOVL1, PRKAR2B, TNFRSF1A, ALOX5AP, PRKAA2, ELOVL6, HADH, HPGDS, GHR, ACSL5, SCD1, CPT1B, ACAA2, SCD2, ACAD4, TBXAS1, NCF1, ALDH5A1, ACADS, PDPE, FADS1, PRKAR2, EPHK2, FADS3, CROT, PTHN, CPT1A, BRCA1, ACADVL, ALOX5, AACS, DEGS1                                                                                                                                                                                                   | 1594       | 184      | 13588     | 2.22            | 5.31E-04   | 1.12E-05  | 2.68E-04 |
| Annotation Cluster 27 | Enrichment Score: 2.4478334888926443                              | Count <th>%</th> <th>PValue</th> <th>Genes</th> <th>List Total</th> <th>Pop Hits</th> <th>Pop Total</th> <th>Fold Enrichment</th> <th>Bonferroni</th> <th>Benjamini</th> <th>FDR</th> | %    | PValue   | Genes                                                                                                                                                                                                                                                                                                                                                                                                                                                                                                                                                   | List Total | Pop Hits | Pop Total | Fold Enrichment | Bonferroni | Benjamini | FDR      |
| GOTERM_BP_FAT         | GO:0051130~positive regulation of cellular component organization | 32                                                                                                                                                                                    | 1.49 | 2.08E-05 | FMNL, PLK4, FCGR2B, TPRP, CFL1, CLEC7A                                                                                                                                                                                                                                                                                                                                                                                                                                                                                                                  | 1594       | 122      | 13588     | 2.24            | 7.30E-02   | 1.26E-03  | 3.83E-02 |
| Annotation Cluster 27 | Enrichment Score: 2.4478334888926443                              | Count <th>%</th> <th>PValue</th> <th>Genes</th> <th>List Total</th> <th>Pop Hits</th> <th>Pop Total</th> <th>Fold Enrichment</th> <th>Bonferroni</th> <th>Benjamini</th> <th>FDR</th> | %    | PValue   | Genes                                                                                                                                                                                                                                                                                                                                                                                                                                                                                                                                                   | List Total | Pop Hits | Pop Total | Fold Enrichment | Bonferroni | Benjamini | FDR      |
| GOTERM_BP_FAT         | GO:0051493~regulation of cytoskeleton organization                | 29                                                                                                                                                                                    | 1.35 | 5.90E-06 | LIMA1, CAPZL, ARPC5, VILL, DSTN, ACTR3, ARPC1, ARPC2, RHOA, RANBP1, SKA1, SYNPO, TES, DBNL, ARHGFE2, CDC8BA, PLEK, CEP192, MYO1F, TMSB10, MID1P1, FMN1, ARPC1B, PLK4, CORO1A, CFL1                                                                                                                                                                                                                                                                                                                                                                      | 1594       | 99       | 13588     | 2.50            | 2.12E-02   | 4.29E-04  | 1.08E-02 |
| Annotation Cluster 30 | Enrichment Score: 2.3517354573541587                              | Count <th>%</th> <th>PValue</th> <th>Genes</th> <th>List Total</th> <th>Pop Hits</th> <th>Pop Total</th> <th>Fold Enrichment</th> <th>Bonferroni</th> <th>Benjamini</th> <th>FDR</th> | %    | PValue   | Genes                                                                                                                                                                                                                                                                                                                                                                                                                                                                                                                                                   | List Total | Pop Hits | Pop Total | Fold Enrichment | Bonferroni | Benjamini | FDR      |
| GOTERM_BP_FAT         | GO:0032956~regulation of actin cytoskeleton organization          | 21                                                                                                                                                                                    | 0.98 | 8.63E-06 | DBNL, LIMA1, CDC8BA, PLEK, CAPZL, MYO1F, TMSB10, ARPC5, VILL, DSTN, ACTR3, FMN1, ARPC1B, CORO1A, ARPC3, ARPC2, CFL1, CAPG, RHOA, TMSB4X, SYNPO                                                                                                                                                                                                                                                                                                                                                                                                          | 1594       | 60       | 13588     | 2.98            | 3.09E-02   | 6.04E-04  | 1.59E-02 |
| Annotation Cluster 30 | Enrichment Score: 2.3517354573541587                              | Count <th>%</th> <th>PValue</th> <th>Genes</th> <th>List Total</th> <th>Pop Hits</th> <th>Pop Total</th> <th>Fold Enrichment</th> <th>Bonferroni</th> <th>Benjamini</th> <th>FDR</th> | %    | PValue   | Genes                                                                                                                                                                                                                                                                                                                                                                                                                                                                                                                                                   | List Total | Pop Hits | Pop Total | Fold Enrichment | Bonferroni | Benjamini | FDR      |
| GOTERM_BP_FAT         | GO:0032970~regulation of actin filament-based process             | 21                                                                                                                                                                                    | 0.98 | 1.14E-05 | CORO1A, ARPC3, ARPC2, CFL1, CAPG, RHOA, TMSB4X, SYNPO                                                                                                                                                                                                                                                                                                                                                                                                                                                                                                   | 1594       | 61       | 13588     | 2.93            | 4.08E-02   | 7.56E-04  | 2.10E-02 |
| Annotation Cluster 30 | Enrichment Score: 2.3517354573541587                              | Count <th>%</th> <th>PValue</th> <th>Genes</th> <th>List Total</th> <th>Pop Hits</th> <th>Pop Total</th> <th>Fold Enrichment</th> <th>Bonferroni</th> <th>Benjamini</th> <th>FDR</th> | %    | PValue   | Genes                                                                                                                                                                                                                                                                                                                                                                                                                                                                                                                                                   | List Total | Pop Hits | Pop Total | Fold Enrichment | Bonferroni | Benjamini | FDR      |
| GOTERM_BP_FAT         | GO:0033043~regulation of organelle organization                   | 38                                                                                                                                                                                    | 1.77 | 1.37E-05 | LIMA1, LST1, CAPZ1, ARPC5, TGF1, VILL, DSTN, ACTR3, CLU7, ARPC1, ARPC2, RHOA, RANBP1, SKA1, TES, SYNPO, TRPS3, DBNL, ARHGFE2, CDC8BA, PLEK, CEP192, NUSAP1, MYO1F, TMSB10, HERC2, MID1P1, UBE2B, FMN1, ARPC1B, CORO1A, PLK4, YWHAH, MAD2L1, CFL1, CAPG, TMSB4X, STMN1                                                                                                                                                                                                                                                                                   | 1594       | 154      | 13588     | 2.10            | 4.88E-02   | 8.77E-04  | 2.53E-02 |
| Annotation Cluster 32 | Enrichment Score: 2.1864103669617593                              | Count <th>%</th> <th>PValue</th> <th>Genes</th> <th>List Total</th> <th>Pop Hits</th> <th>Pop Total</th> <th>Fold Enrichment</th> <th>Bonferroni</th> <th>Benjamini</th> <th>FDR</th> | %    | PValue   | Genes                                                                                                                                                                                                                                                                                                                                                                                                                                                                                                                                                   | List Total | Pop Hits | Pop Total | Fold Enrichment | Bonferroni | Benjamini | FDR      |
| GOTERM_MF_FAT         | GO:0030095~GTPase regulator activity                              | 70                                                                                                                                                                                    | 3.25 | 1.14E-05 | RASGEF1B, ARHGAP18, IQGAP2, ARHGAP15, RGL1, IQGAP1, TRC1D16, HMHA1, ARHGAP22, DMXL2, ARHGAP20, RINL, ARHGAP1, RANBP1, ARHGAP11A, DOCK10, DOCK11, DAR2IP, ARHGFE2, MADD, ARHGFE6, RAB11L1, ARHGAP2B, PSD4, ARHGFE9, ECT2, WAS, THY1, ARHGAP25, ARHGAP30, MAP4K4, RIN2, SRGAP3, RIN1, FGD2, ARFGAP3, TRC1D9, GPSM3, CYTH4, MAFK1, MYO9B, ADAF1, DOCK2, RASGRP3, GMP, SOS2, RASAL3, IQSEC3, RASA3, RAP1GAP2, FGD3, ARHGDI4, ARHGDI8, OBSLN, TRC1D2B, VAV3, ABR, EXPH5, RGS18, DOCK8, RGS16, RACGAP1, DOCK5, VAV1, RGS14, ADAP2, RGS2, SH3BP1, ARAP1, BCAR3 | 1524       | 361      | 13288     | 1.69            | 1.45E-02   | 7.32E-04  | 1.86E-02 |
| Annotation Cluster 32 | Enrichment Score: 2.1864103669617593                              | Count <th>%</th> <th>PValue</th> <th>Genes</th> <th>List Total</th> <th>Pop Hits</th> <th>Pop Total</th> <th>Fold Enrichment</th> <th>Bonferroni</th> <th>Benjamini</th> <th>FDR</th> | %    | PValue   | Genes                                                                                                                                                                                                                                                                                                                                                                                                                                                                                                                                                   | List Total | Pop Hits | Pop Total | Fold Enrichment | Bonferroni | Benjamini | FDR      |
| GOTERM_MF_FAT         | GO:0060589~nucleoside-triphosphatase regulator activity           | 70                                                                                                                                                                                    | 3.25 | 2.01E-05 | SH3BP1, ARAP1, BCAR3                                                                                                                                                                                                                                                                                                                                                                                                                                                                                                                                    | 1524       | 367      | 13288     | 1.66            | 2.55E-02   | 1.07E-03  | 3.27E-02 |
| Annotation Cluster 58 | Enrichment Score: 1.561380646898854                               | Count <th>%</th> <th>PValue</th> <th>Genes</th> <th>List Total</th> <th>Pop Hits</th> <th>Pop Total</th> <th>Fold Enrichment</th> <th>Bonferroni</th> <th>Benjamini</th> <th>FDR</th> | %    | PValue   | Genes                                                                                                                                                                                                                                                                                                                                                                                                                                                                                                                                                   | List Total | Pop Hits | Pop Total | Fold Enrichment | Bonferroni | Benjamini | FDR      |
| GOTERM_BP_FAT         | GO:0002684~positive regulation of immune system process           | 50                                                                                                                                                                                    | 2.32 | 8.11E-07 | IL18, STAT5B, HPS1, TLR2, PTPN22, TLR4, C1QC, PNP, TLR8, TGF1, B2M, CFP, KLH6, MYD88, HSP90AA1, IYIN, NFKB1, CD40, THY1, CD1A, C1QB, LAT2, CD19, H2-AA, ITGAL, LARA, UNC93B1, IL7R, ADA, CD74, SLC11A1, FCER1G, IL2RG, SH2B2, NPFSO, THBS1, PTPN6, PTPN8, CARD9, H2-M1, IKZF1, CFB, FCGR1, FCGR3, CORO1A, CDKN1A, PLCG2, CLEC7A, H2-DMA, SASH3                                                                                                                                                                                                          | 1594       | 206      | 13588     | 2.07            | 2.95E-03   | 8.94E-05  | 1.49E-03 |
| Annotation Cluster 69 | Enrichment Score: 1.2861838620748725                              | Count <th>%</th> <th>PValue</th> <th>Genes</th> <th>List Total</th> <th>Pop Hits</th> <th>Pop Total</th> <th>Fold Enrichment</th> <th>Bonferroni</th> <th>Benjamini</th> <th>FDR</th> | %    | PValue   | Genes                                                                                                                                                                                                                                                                                                                                                                                                                                                                                                                                                   | List Total | Pop Hits | Pop Total | Fold Enrichment | Bonferroni | Benjamini | FDR      |
| GOTERM_BP_FAT         | GO:0044271~nitrogen compound biosynthetic process                 | 61                                                                                                                                                                                    | 2.84 | 2.55E-05 | ADCY7, ATP1B3, HPRT, ATP1B2, LQHD, PNP, MTHFD1L, ANK1, GOT1, HDC, IMPDH1, ATP5K, ATR8B4, HSP90AA1, FCO1, ATPV5D, PADI2, PADI4, ATPV5A, NME1, AUK, RIN2, ATRPC1, ASL1, BCAT1, ALDH1B1, BCAT2, SRM, NAGS, ASNSD1, ASNS, ADN1, CMPK1, ADA, TVMS, ATPVOE, ALDH4A1, DCTD, TCIRG1, CEPBA, ODC1, ADSSL1, NOS1, NPR2, ATP1A1, ATP13A3, AMPD2, AMPD3, MMA8, ATP13A4, APR1, AMPD1, ADH1, P2RX4, ATPV0E2, ADCY9, ATP2A2, SLC7A2, PHGDH, PSAT1, ATRPA1                                                                                                              | 1594       | 302      | 13588     | 1.72            | 8.85E-02   | 1.47E-03  | 4.68E-02 |
| Annotation Cluster 69 | Enrichment Score: 1.2861838620748725                              | Count <th>%</th> <th>PValue</th> <th>Genes</th> <th>List Total</th> <th>Pop Hits</th> <th>Pop Total</th> <th>Fold Enrichment</th> <th>Bonferroni</th> <th>Benjamini</th> <th>FDR</th> | %    | PValue   | Genes                                                                                                                                                                                                                                                                                                                                                                                                                                                                                                                                                   | List Total | Pop Hits | Pop Total | Fold Enrichment | Bonferroni | Benjamini | FDR      |
| GOTERM_BP_FAT         | GO:0009081~branched chain fatty amino acid metabolic process      | 10                                                                                                                                                                                    | 0.46 | 1.06E-05 | BCAT1, BCKDHA, ALDH1A1, BCKDK, BCAT2, STAT5B, BCKDHB, HIBADH, GHR, AUH                                                                                                                                                                                                                                                                                                                                                                                                                                                                                  | 1594       | 15       | 13588     | 5.68            | 3.77E-02   | 7.12E-04  | 1.94E-02 |





| Gene          | Accession  | Protein                       | Start | End   | Score    | Start | End | Score | Start | End | Score |
|---------------|------------|-------------------------------|-------|-------|----------|-------|-----|-------|-------|-----|-------|
| GOTERM_MF_FAT | GO:0032557 | ribonucleotide binding        | 349   | 12.28 | 2.89E-16 |       |     |       |       |     |       |
| GOTERM_MF_FAT | GO:0017076 | purine nucleotide binding     | 358   | 12.60 | 1.12E-09 |       |     |       |       |     |       |
| GOTERM_MF_FAT | GO:0000166 | nucleotide binding            | 397   | 13.97 | 3.73E-08 |       |     |       |       |     |       |
| GOTERM_MF_FAT | GO:0005244 | ATP binding                   | 270   | 9.50  | 1.51E-06 |       |     |       |       |     |       |
| GOTERM_MF_FAT | GO:0032559 | adenyl ribonucleotide binding | 271   | 9.54  | 2.85E-06 |       |     |       |       |     |       |









| Annotation Cluster    | Enrichment Score                                                          | Count | %    | PValue   | Genes                                                                                                                                                                                                                                                                                                                                                                                                                                                                                                                                                                                                                                                                                                                                                                                                                                                                                                                                                                                                                                                                                                                                                                                                                   | List Total | Pop Hits | Pop Total | Fold Enrichment | Bonferroni | Benjamini | FDR      |
|-----------------------|---------------------------------------------------------------------------|-------|------|----------|-------------------------------------------------------------------------------------------------------------------------------------------------------------------------------------------------------------------------------------------------------------------------------------------------------------------------------------------------------------------------------------------------------------------------------------------------------------------------------------------------------------------------------------------------------------------------------------------------------------------------------------------------------------------------------------------------------------------------------------------------------------------------------------------------------------------------------------------------------------------------------------------------------------------------------------------------------------------------------------------------------------------------------------------------------------------------------------------------------------------------------------------------------------------------------------------------------------------------|------------|----------|-----------|-----------------|------------|-----------|----------|
| GOTERM_BP_FAT         | GO:0006793-phosphorus metabolic process                                   | 175   | 6.16 | 5.82E-06 | RNASEL, PASK, STYX, PKMYT1, TTK, PTPN22, BORC, AURKB, PRKG2, TGFBI, BTK, PRKAR2B, APP, UQCRI0, UQCRI1, MDRF, MAP3K8, MIAL, MAP3K6, MARI, PTPN1, PKCZG, EGFR, TYRO3, MAGO, MYL5A, MYLK2, WNK2, PTPRN, PTPRO, MAP4K4, ACAP1, SLC37A2, DLD, NEK8, ATP5C1, POGFRA, RPK3, MAPK7, EIF2AK2, LRRK1, FGR4, FGR, GNAZ, NEK2, STK10, SSH3, PTK7, ACPS, MAP4K1, CHEK1, EPHB3, SRC, CD74, EPHB2, IRAK4, IRAK3, VRK1, PTP4B, CSF1R, TEC, PTPN7, GPD2, MDR1, FCER1A, PTPN6, GPD1, PTPN18, TADK1, HGF, EPHA2, EPHA3, HBEK, EPHA3, DUSP28, P387, PLK4, PLK3, PAZ2, PLK1, GNA, MERTK, ATP5E, IMPA2, NLUK2, SYNL1, FES, CAMKK1, CAMKK2, CCNE1, SH2D1B1, ATP5L, ATP5O, MASTL, CSK, SIK1, ATP4VDD2, CDK15, ATP5H, CDK14, ATP5K, ATP5I, CDC7, CDK1, LYN, PHKG1, LIMK1, NDUFC2, CDK6, PKDCC, PRK, PRKCD, CDK2, DAPK3, PRKCB, MAST3, OSM, ATP6V1A, CND1, PPM1E, UQCRI, RPK1, PPM1H, CFL1, LCK, PPM1A, BUB1B, PPM1L, PPM1M, MELK, UQCRI, CAMK1D, PK, NDUFB, PML, PPM1A, ATP5G1, HSF1G, GALK2, GALK1, STAF4, PTK2B, PPP3C, BUB1, DCLK1, TES, TCIRG1, PTPRC, ALPK1, PTPRE, FLT3, PDK3, HCK, PTPRA, NDUFA7, AXL, ATP5F1, CDKN3, GSG2, CDC25B, DUSP4, CCNB1, RPS6KA6, DUSP4, RPS6KA4, GCK, PTP4A3, RPS6KA1, FYN, GYK, JAK3, DUSP9, CIT, CCK2B, DUSP6 | 2002       | 866      | 13588     | 1.37            | 2.33E-02   | 2.36E-04  | 1.08E-02 |
| Annotation Cluster 35 | Enrichment Score: 2.5545766691173992                                      |       |      |          |                                                                                                                                                                                                                                                                                                                                                                                                                                                                                                                                                                                                                                                                                                                                                                                                                                                                                                                                                                                                                                                                                                                                                                                                                         |            |          |           |                 |            |           |          |
| Category              | Term                                                                      | Count | %    | PValue   | Genes                                                                                                                                                                                                                                                                                                                                                                                                                                                                                                                                                                                                                                                                                                                                                                                                                                                                                                                                                                                                                                                                                                                                                                                                                   | List Total | Pop Hits | Pop Total | Fold Enrichment | Bonferroni | Benjamini | FDR      |
| GOTERM_BP_FAT         | GO:0033559-unsaturated fatty acid metabolic process                       | 19    | 0.67 | 6.23E-07 | FCER1A, TBKAS1, PTPG3, NCF1, POPN, FADS1, EPHK2, LTC4S, CD74, GGT5, TNFRSF1A, PTGS, PTGES, ALOX5AP, ALOX5, HPGD, RNPEP, HRGDS, MGS2                                                                                                                                                                                                                                                                                                                                                                                                                                                                                                                                                                                                                                                                                                                                                                                                                                                                                                                                                                                                                                                                                     | 2002       | 36       | 13588     | 3.58            | 2.53E-03   | 3.05E-05  | 1.16E-03 |
| GOTERM_BP_FAT         | GO:0006690-icosanoid metabolic process                                    | 17    | 0.60 | 7.22E-06 | HPGD, RNPEP, HRGDS, MGS2                                                                                                                                                                                                                                                                                                                                                                                                                                                                                                                                                                                                                                                                                                                                                                                                                                                                                                                                                                                                                                                                                                                                                                                                | 2002       | 34       | 13588     | 3.39            | 2.89E-02   | 2.76E-04  | 1.34E-02 |
| Annotation Cluster 40 | Enrichment Score: 2.3291168681773002                                      |       |      |          |                                                                                                                                                                                                                                                                                                                                                                                                                                                                                                                                                                                                                                                                                                                                                                                                                                                                                                                                                                                                                                                                                                                                                                                                                         |            |          |           |                 |            |           |          |
| Category              | Term                                                                      | Count | %    | PValue   | Genes                                                                                                                                                                                                                                                                                                                                                                                                                                                                                                                                                                                                                                                                                                                                                                                                                                                                                                                                                                                                                                                                                                                                                                                                                   | List Total | Pop Hits | Pop Total | Fold Enrichment | Bonferroni | Benjamini | FDR      |
| GOTERM_BP_FAT         | GO:0050777-negative regulation of immune response                         | 14    | 0.49 | 2.33E-05 | PTPRC, PTPN6, IL27RA, IL7R, TGFBI, GPK1, IRAK3, SH2D1B1, FCGR2B, CD59B, PPP3C, INPP5D, KLFB1B, SPN                                                                                                                                                                                                                                                                                                                                                                                                                                                                                                                                                                                                                                                                                                                                                                                                                                                                                                                                                                                                                                                                                                                      | 2002       | 26       | 13588     | 3.65            | 9.02E-02   | 8.00E-04  | 4.33E-02 |
| Annotation Cluster 43 | Enrichment Score: 2.1580019024363786                                      |       |      |          |                                                                                                                                                                                                                                                                                                                                                                                                                                                                                                                                                                                                                                                                                                                                                                                                                                                                                                                                                                                                                                                                                                                                                                                                                         |            |          |           |                 |            |           |          |
| Category              | Term                                                                      | Count | %    | PValue   | Genes                                                                                                                                                                                                                                                                                                                                                                                                                                                                                                                                                                                                                                                                                                                                                                                                                                                                                                                                                                                                                                                                                                                                                                                                                   | List Total | Pop Hits | Pop Total | Fold Enrichment | Bonferroni | Benjamini | FDR      |
| GOTERM_BP_FAT         | GO:0031341-regulation of cell killing                                     | 16    | 0.56 | 5.44E-06 | H2-K1, PTPRC, H2-M3, KLRK1, IL7R, CD101, PNP, H2-Q7, B2M, P2RX7, SH2D1B1, TAP2, ULBP1, PPP3CB, KLRK1B, LAG3                                                                                                                                                                                                                                                                                                                                                                                                                                                                                                                                                                                                                                                                                                                                                                                                                                                                                                                                                                                                                                                                                                             | 2002       | 30       | 13588     | 3.62            | 2.19E-02   | 2.23E-04  | 1.01E-02 |
| GOTERM_BP_FAT         | GO:0001910-regulation of leukocyte mediated cytotoxicity                  | 16    | 0.56 | 5.44E-06 | H2-K1, PTPRC, H2-M3, KLRK1, IL7R, CD101, PNP, H2-Q7, B2M, P2RX7, SH2D1B1, TAP2, ULBP1, PPP3CB, KLRK1B, LAG3                                                                                                                                                                                                                                                                                                                                                                                                                                                                                                                                                                                                                                                                                                                                                                                                                                                                                                                                                                                                                                                                                                             | 2002       | 30       | 13588     | 3.62            | 2.19E-02   | 2.23E-04  | 1.01E-02 |
| Annotation Cluster 44 | Enrichment Score: 2.143499635516042                                       |       |      |          |                                                                                                                                                                                                                                                                                                                                                                                                                                                                                                                                                                                                                                                                                                                                                                                                                                                                                                                                                                                                                                                                                                                                                                                                                         |            |          |           |                 |            |           |          |
| Category              | Term                                                                      | Count | %    | PValue   | Genes                                                                                                                                                                                                                                                                                                                                                                                                                                                                                                                                                                                                                                                                                                                                                                                                                                                                                                                                                                                                                                                                                                                                                                                                                   | List Total | Pop Hits | Pop Total | Fold Enrichment | Bonferroni | Benjamini | FDR      |
| GOTERM_BP_FAT         | GO:0032101-regulation of response to external stimulus                    | 33    | 1.16 | 1.87E-05 | SBN2, ADORA2B, IL16, C3, TLRA, CXCL12, ADA, GPX1, TNFRSF1A, CD47, NOD2, TNFRSF1B, ADAH, APDH, FCER1G, LBP, THBS1, SPN, CD28, ZFP36, FCER1A, SELP, CLN3, PLEK, CD276, AGER, FCGR1, FCGR3, ANKRD, CD59B, FCGR2B, NPY, FABP7                                                                                                                                                                                                                                                                                                                                                                                                                                                                                                                                                                                                                                                                                                                                                                                                                                                                                                                                                                                               | 2002       | 103      | 13588     | 2.17            | 7.33E-02   | 6.62E-04  | 3.49E-02 |
| Annotation Cluster 50 | Enrichment Score: 2.0226420719661573                                      |       |      |          |                                                                                                                                                                                                                                                                                                                                                                                                                                                                                                                                                                                                                                                                                                                                                                                                                                                                                                                                                                                                                                                                                                                                                                                                                         |            |          |           |                 |            |           |          |
| Category              | Term                                                                      | Count | %    | PValue   | Genes                                                                                                                                                                                                                                                                                                                                                                                                                                                                                                                                                                                                                                                                                                                                                                                                                                                                                                                                                                                                                                                                                                                                                                                                                   | List Total | Pop Hits | Pop Total | Fold Enrichment | Bonferroni | Benjamini | FDR      |
| GOTERM_MF_FAT         | GO:0015077-monovalent inorganic cation transmembrane transporter activity | 33    | 1.16 | 1.79E-07 | SLC9A9, ATP5E, SLC36A1, COX7B, COX7C, ATP5G1, UQCRI1, COX5A, COX5B, UQCRI, UQCRI0, UQCRI1, COX6B1, ATP5L, ATP5O, COX6B2, ATP5VDD2, ATP5H, ATP5K, ATP5I, TCIRG1, COX7A2, COX8B, COX7A1, ATP5F1, ATP1A3, ATP1A4, COX6C, ATP6V1A, UQCRI, COX6A2, ATP5C1, UQCRI, SLC9A9, ATP5E, SLC36A1, COX7B, COX7C, ATP5G1, UQCRI1, COX5A, COX5B, UQCRI, UQCRI0, UQCRI1, COX6B1, ATP5L, ATP5O, COX6B2, ATP5VDD2, ATP5H, ATP5K, ATP5I, TCIRG1, COX7A2, COX8B, COX7A1, ATP5F1, COX6C, ATP6V1A, UQCRI, COX6A2, ATP5C1, UQCRI                                                                                                                                                                                                                                                                                                                                                                                                                                                                                                                                                                                                                                                                                                                | 1916       | 87       | 13288     | 2.63            | 2.37E-04   | 1.97E-05  | 2.93E-04 |
| GOTERM_MF_FAT         | GO:0015078-hydrogen ion transmembrane transporter activity                | 31    | 1.09 | 4.92E-07 | COX7A1, ATP5F1, COX6C, ATP6V1A, UQCRI, COX6A2, ATP5C1, UQCRI                                                                                                                                                                                                                                                                                                                                                                                                                                                                                                                                                                                                                                                                                                                                                                                                                                                                                                                                                                                                                                                                                                                                                            | 1916       | 82       | 13288     | 2.62            | 6.51E-04   | 4.07E-05  | 8.05E-04 |

Table S1.F GO Terms upregulated 168 hours post injury

| Annotation Cluster 1  | Enrichment Score: 14.55639886357477  | Term                                                                                 | Count % | PValue | Genes    | List Total                                                                                                                                                                                                                                                                                                                                          | Pop Hrs | Pop Total | Fold Enrichment | Bonferroni | Benjamini | FDR      |          |
|-----------------------|--------------------------------------|--------------------------------------------------------------------------------------|---------|--------|----------|-----------------------------------------------------------------------------------------------------------------------------------------------------------------------------------------------------------------------------------------------------------------------------------------------------------------------------------------------------|---------|-----------|-----------------|------------|-----------|----------|----------|
| GOTERM_BP_FAT         | GO:0006955                           | immune response                                                                      | 49      | 14.16  | 6.60E-23 | LY86, TLR2, CD101, CIQC, TLR7, IL10, CFP, OASL2, AF251705, NCF1, C4B, H2-DMB1, CIQA, CIQB, IL18PP, CCR5, IL18B3, CX3CR1, LILRB4, CCR2, OAS1A, IL12B, OAS1G, CD300LD, CD300LD, CCL2, LST1, CCL3, CCL4, OAS2, CCL7, SLC11A1, GP49A, FCER1G, CD4, CD7, TLR43, MYD1F, CD90C, FCGR1, CD180, CCL17, FCGR3, CCL12, CD300A, PLCG2, IRF8, CLEC7A, XCL1, CD14 | 249     | 471       | 13588           | 5.68       | 1.03E-19  | 1.03E-19 | 1.10E-19 |
| GOTERM_BP_FAT         | GO:0006952                           | defense response                                                                     | 37      | 10.69  | 5.48E-14 | LY22, C4B, NCF1, HCK, CAMP, TLR13, SAA3, MYD1F, CDT11, FCGR1, CD180, FCGR3, CCL17, CIQA, CIQB, CCL12, CD86, IRF8, CXCL, CLEC7A, CD14, ORMD2                                                                                                                                                                                                         | 249     | 448       | 13588           | 4.51       | 8.55E-11  | 4.28E-11 | 9.15E-11 |
| GOTERM_BP_FAT         | GO:0006954                           | inflammatory response                                                                | 26      | 7.51   | 4.19E-13 | FCGR1, CD180, FCGR3, CIQA, CCL12, CIQB, CCR5, CCR2, CLEC7A, ORMD2, CD14                                                                                                                                                                                                                                                                             | 249     | 225       | 13588           | 6.31       | 6.53E-10  | 2.18E-10 | 6.99E-10 |
| GOTERM_BP_FAT         | GO:0009611                           | response to wounding                                                                 | 29      | 8.38   | 3.92E-11 | CCL2, LY86, TLR2, CCL8, ITGB2, CIQC, TLR7, CCL7, CFP, SLC11A1, PYCARD, TFP12, PLK6, GATM, NCF1, C4B, TLR13, SAA3, FCGR1, CD180, FCGR3, CIQA, CIQB, CCL12, CCR5, CCR2, CLEC7A, ORMD2, CD14                                                                                                                                                           | 249     | 347       | 13588           | 4.56       | 6.12E-08  | 1.53E-08 | 6.55E-08 |
| Annotation Cluster 2  | Enrichment Score: 5.49112366075224   | Term                                                                                 | Count % | PValue | Genes    | List Total                                                                                                                                                                                                                                                                                                                                          | Pop Hrs | Pop Total | Fold Enrichment | Bonferroni | Benjamini | FDR      |          |
| GOTERM_BP_FAT         | GO:0042742                           | defense response to bacterium                                                        | 13      | 3.76   | 6.20E-07 | LY22, FGR, NCF1, CAMP, HCK, TLR2, MYD1F, FCGR1, IL10, SLC11A1, CCR5, IRF8, FCER1G                                                                                                                                                                                                                                                                   | 249     | 108       | 13588           | 6.37       | 9.66E-04  | 6.90E-05 | 1.03E-03 |
| GOTERM_BP_FAT         | GO:0009617                           | response to bacterium                                                                | 15      | 4.34   | 1.08E-06 | LY22, FGR, NCF1, CAMP, HCK, TLR2, MYD1F, FCGR1, IL10, SLC11A1, CCR5, IRF8, PLCG2, FCER1G, CD14                                                                                                                                                                                                                                                      | 249     | 157       | 13588           | 5.21       | 1.69E-03  | 1.13E-04 | 1.81E-03 |
| Annotation Cluster 3  | Enrichment Score: 4.990727463947588  | Term                                                                                 | Count % | PValue | Genes    | List Total                                                                                                                                                                                                                                                                                                                                          | Pop Hrs | Pop Total | Fold Enrichment | Bonferroni | Benjamini | FDR      |          |
| GOTERM_BP_FAT         | GO:0001819                           | positive regulation of cytokine production                                           | 11      | 3.18   | 1.60E-07 | CD83, SLC11A1, KLR1, PYCARD, TLR2, FCER1G, CLEC7A, CASP1, TLR7, SASH3, CD14                                                                                                                                                                                                                                                                         | 249     | 62        | 13588           | 9.68       | 2.49E-04  | 2.27E-05 | 2.67E-04 |
| GOTERM_BP_FAT         | GO:0001817                           | regulation of cytokine production                                                    | 15      | 4.34   | 2.44E-07 | TLR2, CD101, TLR7, IL10, FCGR1, SLC11A1, CD83, HMOX1, KLR1, PYCARD, FCER1G, CLEC7A, CASP1, SASH3, CD14                                                                                                                                                                                                                                              | 249     | 139       | 13588           | 5.89       | 3.80E-04  | 3.16E-05 | 4.07E-04 |
| Annotation Cluster 4  | Enrichment Score: 4.97611947115325   | Term                                                                                 | Count % | PValue | Genes    | List Total                                                                                                                                                                                                                                                                                                                                          | Pop Hrs | Pop Total | Fold Enrichment | Bonferroni | Benjamini | FDR      |          |
| GOTERM_BP_FAT         | GO:0042330                           | taxis                                                                                | 15      | 4.34   | 1.08E-08 | CX3CR1, CCL2, CCL9, CCL8, ITGB2, CCL7, CCL17, FCGR3, CCL12, CORO1A, RAC2, CX3CR1, FCER1G, XCR1, XCL1                                                                                                                                                                                                                                                | 249     | 109       | 13588           | 7.51       | 1.69E-05  | 1.88E-06 | 1.81E-05 |
| GOTERM_BP_FAT         | GO:0006933                           | chemotaxis                                                                           | 15      | 4.34   | 1.08E-08 | XCL1                                                                                                                                                                                                                                                                                                                                                | 249     | 109       | 13588           | 7.51       | 1.69E-05  | 1.88E-06 | 1.81E-05 |
| GOTERM_MF_FAT         | GO:0008009                           | chemokine receptor binding                                                           | 7       | 2.02   | 2.84E-05 | PLCG2, CX3CR1, KLR1, FCER1G, CD4, IL12B, HELLS, RHOM, LOP2                                                                                                                                                                                                                                                                                          | 214     | 38        | 13588           | 11.44      | 9.14E-03  | 1.58E-03 | 3.84E-02 |
| GOTERM_MF_FAT         | GO:0042339                           | chemokine receptor binding                                                           | 7       | 2.02   | 3.32E-05 | CCL12, CCL2, CCL9, CCL8, XCL1, CCL7, CCL17                                                                                                                                                                                                                                                                                                          | 214     | 39        | 13288           | 11.14      | 1.07E-02  | 3.56E-03 | 4.48E-02 |
| Annotation Cluster 5  | Enrichment Score: 4.73436415573175   | Term                                                                                 | Count % | PValue | Genes    | List Total                                                                                                                                                                                                                                                                                                                                          | Pop Hrs | Pop Total | Fold Enrichment | Bonferroni | Benjamini | FDR      |          |
| GOTERM_BP_FAT         | GO:0001775                           | cell activation                                                                      | 24      | 6.94   | 1.31E-10 | FYB, LST1, PLEK, MYD1F, RORC, ITGB2, SFP1, CD1D1, WAS, FCGR3, CD48, SLC11A1, BCL2A1D, CD86, IL18B3, PLCG2, CX3CR1, KLR1, FCER1G, CD4, IL12B, HELLS, RHOM, LOP2                                                                                                                                                                                      | 249     | 246       | 13588           | 5.32       | 2.04E-07  | 4.08E-08 | 2.19E-07 |
| GOTERM_BP_FAT         | GO:0045321                           | leukocyte activation                                                                 | 22      | 6.36   | 5.46E-10 | FYB, MYD1F, RORC, ITGB2, SFP1, CD1D1, WAS, FCGR3, CD48, SLC11A1, BCL2A1D, CD86, IL18B3, PLCG2, CX3CR1, KLR1, FCER1G, CD4, IL12B, HELLS, RHOM, LOP2                                                                                                                                                                                                  | 249     | 219       | 13588           | 5.48       | 8.52E-07  | 1.42E-07 | 9.12E-07 |
| GOTERM_BP_FAT         | GO:0002274                           | myeloid leukocyte activation                                                         | 10      | 2.89   | 9.07E-09 | FYB, SLC11A1, IL18B3, CX3CR1, MYD1F, FCER1G, SFP1, LOP2, RHOM, FCGR3                                                                                                                                                                                                                                                                                | 249     | 35        | 13588           | 15.59      | 1.41E-05  | 1.77E-06 | 1.51E-05 |
| GOTERM_BP_FAT         | GO:0046649                           | lymphocyte activation                                                                | 15      | 4.34   | 1.09E-05 | RORC, ITGB2, SFP1, CD1D1, WAS, CD48, SLC11A1, CD86, BCL2A1D, PLCG2, KLR1, CD4, IL12B, HELLS, RHOM                                                                                                                                                                                                                                                   | 249     | 191       | 13588           | 4.29       | 1.68E-02  | 8.46E-04 | 1.81E-02 |
| Annotation Cluster 6  | Enrichment Score: 4.102642809152643  | Term                                                                                 | Count % | PValue | Genes    | List Total                                                                                                                                                                                                                                                                                                                                          | Pop Hrs | Pop Total | Fold Enrichment | Bonferroni | Benjamini | FDR      |          |
| GOTERM_BP_FAT         | GO:0002684                           | positive regulation of immune system process                                         | 21      | 6.07   | 1.15E-09 | C4B, TLR2, CD1D1, CIQC, FCGR1, FCGR3, C1QA, C1QB, SLC11A1, CD83, BCL2A1D, CORO1A, PLCG2, KLR1, FCER1G, CD4, IL12B, HELLS, CLEC7A, SASH3                                                                                                                                                                                                             | 249     | 206       | 13588           | 5.56       | 1.79E-06  | 2.56E-07 | 1.92E-06 |
| GOTERM_BP_FAT         | GO:0050778                           | positive regulation of immune response                                               | 16      | 4.62   | 2.64E-08 | C4B, TLR2, CD1D1, CIQC, FCGR1, FCGR3, C1QA, C1QB, SLC11A1, BCL2A1D, PLCG2, KLR1, FCER1G, CLEC7A, SASH3                                                                                                                                                                                                                                              | 249     | 136       | 13588           | 6.42       | 4.11E-05  | 4.11E-06 | 4.40E-05 |
| GOTERM_BP_FAT         | GO:0045087                           | innate immune response                                                               | 13      | 3.76   | 5.60E-07 | C4B, TLR2, CD1D1, CIQC, FCGR1, FCGR3, C1QA, C1QB, SLC11A1, BCL2A1D, PLCG2, KLR1, FCER1G, CLEC7A, SASH3                                                                                                                                                                                                                                              | 249     | 107       | 13588           | 6.63       | 8.73E-04  | 6.72E-05 | 9.35E-04 |
| GOTERM_BP_FAT         | GO:0048584                           | positive regulation of response to stimulus                                          | 16      | 4.62   | 1.60E-06 | FCER1G, CLEC7A, SASH3                                                                                                                                                                                                                                                                                                                               | 249     | 186       | 13588           | 4.69       | 2.50E-03  | 1.56E-04 | 2.68E-03 |
| GOTERM_BP_FAT         | GO:0002252                           | immune effector process                                                              | 13      | 3.76   | 3.24E-06 | NCF1, C4B, MYD1F, CIQC, FCGR1, TLR7, FCGR3, C1QA, CFP, SLC11A1, CIQB, IL18B3, FCER1G                                                                                                                                                                                                                                                                | 249     | 126       | 13588           | 5.63       | 5.04E-03  | 2.97E-04 | 5.41E-03 |
| GOTERM_BP_FAT         | GO:0002253                           | activation of immune response                                                        | 11      | 3.18   | 3.59E-06 | C1QA, CFP, CIQB, BCL2A1D, C4B, PLCG2, KLR1, TLR2, FCER1G, CLEC7A, CIQC                                                                                                                                                                                                                                                                              | 249     | 86        | 13588           | 6.98       | 5.58E-03  | 3.11E-04 | 5.99E-03 |
| GOTERM_BP_FAT         | GO:0002443                           | leukocyte mediated immunity                                                          | 11      | 3.18   | 4.91E-06 | C1QA, CIQB, SLC11A1, NCF1, C4B, IL18B3, MYD1F, FCER1G, CIQC, FCGR1, FCGR3                                                                                                                                                                                                                                                                           | 249     | 89        | 13588           | 6.74       | 7.63E-03  | 4.03E-04 | 8.20E-03 |
| GOTERM_BP_FAT         | GO:0002359                           | adaptive immune response                                                             | 10      | 2.89   | 2.17E-05 | C1QA, CIQB, SLC11A1, IL18B3, C4B, IL18B3, FCER1G, CIQC, FCGR1, FCGR3                                                                                                                                                                                                                                                                                | 249     | 84        | 13588           | 6.50       | 3.33E-02  | 1.61E-03 | 3.63E-02 |
| GOTERM_BP_FAT         | GO:0002460                           | adaptive immune response based on somatic recombination of immune receptors built fr | 10      | 2.89   | 2.17E-05 | C1QA, CIQB, SLC11A1, IL18B3, C4B, IL18B3, FCER1G, CIQC, FCGR1, FCGR3                                                                                                                                                                                                                                                                                | 249     | 84        | 13588           | 6.50       | 3.33E-02  | 1.61E-03 | 3.63E-02 |
| Annotation Cluster 7  | Enrichment Score: 3.0962877308218895 | Term                                                                                 | Count % | PValue | Genes    | List Total                                                                                                                                                                                                                                                                                                                                          | Pop Hrs | Pop Total | Fold Enrichment | Bonferroni | Benjamini | FDR      |          |
| GOTERM_BP_FAT         | GO:0050778                           | positive regulation of immune response                                               | 16      | 4.62   | 2.64E-08 | C4B, TLR2, CD1D1, CIQC, FCGR1, FCGR3, C1QA, C1QB, SLC11A1, BCL2A1D, PLCG2, KLR1, FCER1G, CLEC7A, SASH3                                                                                                                                                                                                                                              | 249     | 136       | 13588           | 6.42       | 4.11E-05  | 4.11E-06 | 4.40E-05 |
| GOTERM_BP_FAT         | GO:0048584                           | positive regulation of response to stimulus                                          | 16      | 4.62   | 1.60E-06 | FCER1G, CLEC7A, SASH3                                                                                                                                                                                                                                                                                                                               | 249     | 186       | 13588           | 4.69       | 2.50E-03  | 1.56E-04 | 2.68E-03 |
| Annotation Cluster 12 | Enrichment Score: 2.1332794229095495 | Term                                                                                 | Count % | PValue | Genes    | List Total                                                                                                                                                                                                                                                                                                                                          | Pop Hrs | Pop Total | Fold Enrichment | Bonferroni | Benjamini | FDR      |          |
| GOTERM_BP_FAT         | GO:0006909                           | phagocytosis                                                                         | 8       | 2.31   | 2.77E-05 | SLC11A1, HCK, IRF8, FCER1G, CLEC7A, MEGF10, FCGR1, FCGR3                                                                                                                                                                                                                                                                                            | 249     | 49        | 13588           | 8.91       | 4.23E-02  | 1.96E-03 | 4.62E-02 |
| Annotation Cluster 13 | Enrichment Score: 2.04835886290177   | Term                                                                                 | Count % | PValue | Genes    | List Total                                                                                                                                                                                                                                                                                                                                          | Pop Hrs | Pop Total | Fold Enrichment | Bonferroni | Benjamini | FDR      |          |
| GOTERM_MF_FAT         | GO:0019955                           | cytokine binding                                                                     | 11      | 3.18   | 1.38E-06 | IL18PP, CCR5, CSF2NB2, IL10RA, CCR2, CX3CR1, CSF2NB, IL12B, IL12B, XCR1, CSF2BA                                                                                                                                                                                                                                                                     | 214     | 88        | 13288           | 7.76       | 4.45E-04  | 4.45E-04 | 1.86E-03 |

Table S1.6 GO Terms upregulated 336 hours post injury

| Annotation Cluster 1  | Enrichment Score: 14.55639806357477  | Term                                                                                 | Count % | PValue | Genes    | List Total                                                                                                                                                                                                                                                                                                                                          | Pop Hrs | Pop Total | Fold Enrichment | Bonferroni | Benjamini | FDR      |          |
|-----------------------|--------------------------------------|--------------------------------------------------------------------------------------|---------|--------|----------|-----------------------------------------------------------------------------------------------------------------------------------------------------------------------------------------------------------------------------------------------------------------------------------------------------------------------------------------------------|---------|-----------|-----------------|------------|-----------|----------|----------|
| GOTERM_BP_FAT         | GO:0006955                           | immune response                                                                      | 49      | 14.16  | 6.60E-23 | LY86, TLR2, CD101, C1QC, TLR7, IL10, CFP, OASL2, AF251705, NCF1, C4B, H2-DMB1, C1QA, C1QB, IL18PP, CCR5, IL18R3, CX3CR1, LILRB4, CCR2, OAS1A, IL12B, OAS1G, CD300LD, CD300LD, CCL2, LST1, CCL3, CCL4, OAS2, CCL7, SLC11A1, GP49A, FCER1G, CD4, CD7, TLR43, MYD1F, CD90C, FCGR1, CD180, CCL17, FCGR3, CCL12, CD300A, PLCG2, IRF8, CLEC7A, XCL1, CD14 | 249     | 471       | 13588           | 5.68       | 1.03E-19  | 1.03E-19 | 1.10E-19 |
| GOTERM_BP_FAT         | GO:0006952                           | defense response                                                                     | 37      | 10.69  | 5.48E-14 | CCL2, C4B, NCF1, HCK, CAMP, TLR13, SAA3, MYD1F, CDT11, FCGR1, CD180, FCGR3, CCL17, C1QA, C1QB, CCL12, CD86, IRF8, CXCL, CLEC7A, CD14, OMS4                                                                                                                                                                                                          | 249     | 448       | 13588           | 4.51       | 8.55E-11  | 4.28E-11 | 9.15E-11 |
| GOTERM_BP_FAT         | GO:0006954                           | inflammatory response                                                                | 26      | 7.51   | 4.19E-13 | FCGR1, CD180, FCGR3, C1QA, CCL12, C1QB, CCR5, CCR2, CLEC7A, OMS2, CD14                                                                                                                                                                                                                                                                              | 249     | 225       | 13588           | 6.31       | 6.53E-10  | 2.18E-10 | 6.99E-10 |
| GOTERM_BP_FAT         | GO:0009611                           | response to wounding                                                                 | 29      | 8.38   | 3.92E-11 | CCL2, LY86, TLR2, CCL8, ITGB2, C1QC, TLR7, CCL7, CFP, SLC11A1, PYCARD, TFP12, PLK1, GATM, NCF1, C4B, TLR13, SAA3, FCGR1, CD180, FCGR3, C1QA, C1QB, CCL12, CCR5, CCR2, CLEC7A, OMS2, CD14                                                                                                                                                            | 249     | 347       | 13588           | 4.56       | 6.12E-08  | 1.53E-08 | 6.55E-08 |
| Annotation Cluster 2  | Enrichment Score: 5.49112366075224   | Term                                                                                 | Count % | PValue | Genes    | List Total                                                                                                                                                                                                                                                                                                                                          | Pop Hrs | Pop Total | Fold Enrichment | Bonferroni | Benjamini | FDR      |          |
| GOTERM_BP_FAT         | GO:0042742                           | defense response to bacterium                                                        | 13      | 3.76   | 6.20E-07 | LY22, FGR, NCF1, CAMP, HCK, TLR2, MYD1F, FCGR1, IL10, SLC11A1, CCR5, IRF8, FCER1G                                                                                                                                                                                                                                                                   | 249     | 108       | 13588           | 6.57       | 9.66E-04  | 6.90E-05 | 1.03E-03 |
| GOTERM_BP_FAT         | GO:0009617                           | response to bacterium                                                                | 15      | 4.34   | 1.08E-06 | LY22, FGR, NCF1, CAMP, HCK, TLR2, MYD1F, FCGR1, IL10, SLC11A1, CCR5, IRF8, PLCG2, FCER1G, CD14                                                                                                                                                                                                                                                      | 249     | 157       | 13588           | 5.21       | 1.69E-03  | 1.13E-04 | 1.81E-03 |
| Annotation Cluster 3  | Enrichment Score: 4.990727463947588  | Term                                                                                 | Count % | PValue | Genes    | List Total                                                                                                                                                                                                                                                                                                                                          | Pop Hrs | Pop Total | Fold Enrichment | Bonferroni | Benjamini | FDR      |          |
| GOTERM_BP_FAT         | GO:0001819                           | positive regulation of cytokine production                                           | 11      | 3.18   | 1.60E-07 | CD83, SLC11A1, KLR1, PYCARD, TLR2, FCER1G, CLEC7A, CASP1, TLR7, SASH3, CD14                                                                                                                                                                                                                                                                         | 249     | 62        | 13588           | 9.68       | 2.49E-04  | 2.27E-05 | 2.67E-04 |
| GOTERM_BP_FAT         | GO:0001817                           | regulation of cytokine production                                                    | 15      | 4.34   | 2.44E-07 | TLR2, CD101, TLR7, IL10, FCGR1, SLC11A1, CD83, HMOX1, KLR1, PYCARD, FCER1G, CLEC7A, CASP1, SASH3, CD14                                                                                                                                                                                                                                              | 249     | 139       | 13588           | 5.89       | 3.80E-04  | 3.16E-05 | 4.07E-04 |
| Annotation Cluster 4  | Enrichment Score: 4.97611947115325   | Term                                                                                 | Count % | PValue | Genes    | List Total                                                                                                                                                                                                                                                                                                                                          | Pop Hrs | Pop Total | Fold Enrichment | Bonferroni | Benjamini | FDR      |          |
| GOTERM_BP_FAT         | GO:0042330                           | taxis                                                                                | 15      | 4.34   | 1.08E-08 | CX3CR1, CCL2, CCL9, CCL8, ITGB2, CCL7, CCL17, FCGR3, CCL12, CORO1A, RAC2, CX3CR1, FCER1G, XCR1, XCL1                                                                                                                                                                                                                                                | 249     | 109       | 13588           | 7.51       | 1.69E-05  | 1.88E-06 | 1.81E-05 |
| GOTERM_BP_FAT         | GO:0006933                           | chemotaxis                                                                           | 15      | 4.34   | 1.08E-08 | XCL1                                                                                                                                                                                                                                                                                                                                                | 249     | 109       | 13588           | 7.51       | 1.69E-05  | 1.88E-06 | 1.81E-05 |
| GOTERM_MF_FAT         | GO:0008009                           | chemokine receptor binding                                                           | 7       | 2.02   | 2.84E-05 | PLCG2, CX3CR1, KLR1, FCER1G, CD4, IL12B, HELLS, RHOH, LOP2                                                                                                                                                                                                                                                                                          | 214     | 38        | 13588           | 11.44      | 9.14E-03  | 1.58E-03 | 3.84E-02 |
| GOTERM_MF_FAT         | GO:0042339                           | chemokine receptor binding                                                           | 7       | 2.02   | 3.32E-05 | CCL12, CCL9, CCL8, XCL1, CCL7, CCL17                                                                                                                                                                                                                                                                                                                | 214     | 39        | 13288           | 11.14      | 1.07E-02  | 3.56E-03 | 4.48E-02 |
| Annotation Cluster 5  | Enrichment Score: 4.73436415573175   | Term                                                                                 | Count % | PValue | Genes    | List Total                                                                                                                                                                                                                                                                                                                                          | Pop Hrs | Pop Total | Fold Enrichment | Bonferroni | Benjamini | FDR      |          |
| GOTERM_BP_FAT         | GO:0001775                           | cell activation                                                                      | 24      | 6.94   | 1.31E-10 | FYB, LST1, PLEK, MYD1F, RORC, ITGB2, SFP1, CD1D1, WAS, FCGR3, CD48, SLC11A1, BCL2A1D, CD86, IL18R3, PLCG2, CX3CR1, KLR1, FCER1G, CD4, IL12B, HELLS, RHOH, LOP2                                                                                                                                                                                      | 249     | 246       | 13588           | 5.32       | 2.04E-07  | 4.08E-08 | 2.19E-07 |
| GOTERM_BP_FAT         | GO:0045321                           | leukocyte activation                                                                 | 22      | 6.36   | 3.46E-10 | FYB, MYD1F, RORC, ITGB2, SFP1, CD1D1, WAS, FCGR3, CD48, SLC11A1, BCL2A1D, CD86, IL18R3, PLCG2, CX3CR1, KLR1, FCER1G, CD4, IL12B, HELLS, RHOH, LOP2                                                                                                                                                                                                  | 249     | 219       | 13588           | 5.48       | 8.52E-07  | 1.42E-07 | 9.12E-07 |
| GOTERM_BP_FAT         | GO:0002274                           | myeloid leukocyte activation                                                         | 10      | 2.89   | 9.07E-09 | FYB, SLC11A1, IL18R3, CX3CR1, MYD1F, FCER1G, SFP1, LOP2, RHOH, FCGR3                                                                                                                                                                                                                                                                                | 249     | 35        | 13588           | 15.59      | 1.41E-05  | 1.77E-06 | 1.51E-05 |
| GOTERM_BP_FAT         | GO:0046649                           | lymphocyte activation                                                                | 15      | 4.34   | 1.09E-05 | RORC, ITGB2, SFP1, CD1D1, WAS, CD48, SLC11A1, CD86, BCL2A1D, PLCG2, KLR1, CD4, IL12B, HELLS, RHOH                                                                                                                                                                                                                                                   | 249     | 191       | 13588           | 4.29       | 1.68E-02  | 8.46E-04 | 1.81E-02 |
| Annotation Cluster 6  | Enrichment Score: 4.102642809152643  | Term                                                                                 | Count % | PValue | Genes    | List Total                                                                                                                                                                                                                                                                                                                                          | Pop Hrs | Pop Total | Fold Enrichment | Bonferroni | Benjamini | FDR      |          |
| GOTERM_BP_FAT         | GO:0002684                           | positive regulation of immune system process                                         | 21      | 6.07   | 1.15E-09 | C4B, TLR2, CD1D1, C1QC, FCGR1, FCGR3, C1QA, C1QB, SLC11A1, CD83, BCL2A1D, CORO1A, PLCG2, KLR1, FCER1G, CD4, IL12B, CLEC7A, SASH3                                                                                                                                                                                                                    | 249     | 206       | 13588           | 5.56       | 1.79E-06  | 2.56E-07 | 1.92E-06 |
| GOTERM_BP_FAT         | GO:0050778                           | positive regulation of immune response                                               | 16      | 4.62   | 2.64E-08 | C4B, TLR2, CD1D1, C1QC, FCGR1, FCGR3, C1QA, CFP, C1QB, SLC11A1, BCL2A1D, PLCG2, KLR1, FCER1G, CLEC7A, SASH3                                                                                                                                                                                                                                         | 249     | 136       | 13588           | 6.42       | 4.11E-05  | 4.11E-06 | 4.40E-05 |
| GOTERM_BP_FAT         | GO:0045087                           | innate immune response                                                               | 13      | 3.76   | 5.60E-07 | C4B, TLR2, CD1D1, C1QC, FCGR1, FCGR3, C1QA, CFP, C1QB, SLC11A1, BCL2A1D, PLCG2, KLR1, FCER1G, CLEC7A, SASH3                                                                                                                                                                                                                                         | 249     | 107       | 13588           | 6.63       | 8.73E-04  | 6.72E-05 | 9.35E-04 |
| GOTERM_BP_FAT         | GO:0048584                           | positive regulation of response to stimulus                                          | 16      | 4.62   | 1.60E-06 | FCER1G, CLEC7A, SASH3                                                                                                                                                                                                                                                                                                                               | 249     | 186       | 13588           | 4.69       | 2.50E-03  | 1.56E-04 | 2.68E-03 |
| GOTERM_BP_FAT         | GO:0002252                           | immune effector process                                                              | 13      | 3.76   | 3.24E-06 | NCF1, C4B, MYD1F, C1QC, FCGR1, TLR7, FCGR3, C1QA, CFP, SLC11A1, C1QB, IL18R3, FCER1G                                                                                                                                                                                                                                                                | 249     | 126       | 13588           | 5.63       | 5.04E-03  | 2.97E-04 | 5.41E-03 |
| GOTERM_BP_FAT         | GO:0002253                           | activation of immune response                                                        | 11      | 3.18   | 3.59E-06 | C1QA, CFP, C1QB, BCL2A1D, C4B, PLCG2, KLR1, TLR2, FCER1G, CLEC7A, C1QC                                                                                                                                                                                                                                                                              | 249     | 86        | 13588           | 6.98       | 5.58E-03  | 3.11E-04 | 5.99E-03 |
| GOTERM_BP_FAT         | GO:0002443                           | leukocyte mediated immunity                                                          | 11      | 3.18   | 4.91E-06 | C1QA, C1QB, SLC11A1, NCF1, C4B, IL18R3, MYD1F, FCER1G, C1QC, FCGR1, FCGR3                                                                                                                                                                                                                                                                           | 249     | 89        | 13588           | 6.74       | 7.63E-03  | 4.03E-04 | 8.20E-03 |
| GOTERM_BP_FAT         | GO:0002359                           | adaptive immune response                                                             | 10      | 2.89   | 2.17E-05 | C1QA, C1QB, SLC11A1, IL18R3, C4B, IL18R3, FCER1G, C1QC, FCGR1, FCGR3                                                                                                                                                                                                                                                                                | 249     | 84        | 13588           | 6.50       | 3.33E-02  | 1.61E-03 | 3.63E-02 |
| GOTERM_BP_FAT         | GO:0002460                           | adaptive immune response based on somatic recombination of immune receptors built fr | 10      | 2.89   | 2.17E-05 | C1QA, C1QB, SLC11A1, IL18R3, C4B, IL18R3, FCER1G, C1QC, FCGR1, FCGR3                                                                                                                                                                                                                                                                                | 249     | 84        | 13588           | 6.50       | 3.33E-02  | 1.61E-03 | 3.63E-02 |
| Annotation Cluster 7  | Enrichment Score: 3.0962877308218895 | Term                                                                                 | Count % | PValue | Genes    | List Total                                                                                                                                                                                                                                                                                                                                          | Pop Hrs | Pop Total | Fold Enrichment | Bonferroni | Benjamini | FDR      |          |
| GOTERM_BP_FAT         | GO:0050778                           | positive regulation of immune response                                               | 16      | 4.62   | 2.64E-08 | C4B, TLR2, CD1D1, C1QC, FCGR1, FCGR3, C1QA, CFP, C1QB, SLC11A1, BCL2A1D, PLCG2, KLR1, FCER1G, CLEC7A, SASH3                                                                                                                                                                                                                                         | 249     | 136       | 13588           | 6.42       | 4.11E-05  | 4.11E-06 | 4.40E-05 |
| GOTERM_BP_FAT         | GO:0048584                           | positive regulation of response to stimulus                                          | 16      | 4.62   | 1.60E-06 | C4B, TLR2, CD1D1, C1QC, FCGR1, FCGR3, C1QA, CFP, C1QB, SLC11A1, BCL2A1D, PLCG2, KLR1, FCER1G, CLEC7A, SASH3                                                                                                                                                                                                                                         | 249     | 186       | 13588           | 4.69       | 2.50E-03  | 1.56E-04 | 2.68E-03 |
| Annotation Cluster 12 | Enrichment Score: 2.1332794229095495 | Term                                                                                 | Count % | PValue | Genes    | List Total                                                                                                                                                                                                                                                                                                                                          | Pop Hrs | Pop Total | Fold Enrichment | Bonferroni | Benjamini | FDR      |          |
| GOTERM_BP_FAT         | GO:0006909                           | phagocytosis                                                                         | 8       | 2.31   | 2.77E-05 | SLC11A1, HCK, IRF8, FCER1G, CLEC7A, MEGF10, FCGR1, FCGR3                                                                                                                                                                                                                                                                                            | 249     | 49        | 13588           | 8.91       | 4.23E-02  | 1.96E-03 | 4.62E-02 |
| Annotation Cluster 13 | Enrichment Score: 2.04835886290177   | Term                                                                                 | Count % | PValue | Genes    | List Total                                                                                                                                                                                                                                                                                                                                          | Pop Hrs | Pop Total | Fold Enrichment | Bonferroni | Benjamini | FDR      |          |
| GOTERM_MF_FAT         | GO:0019955                           | cytokine binding                                                                     | 11      | 3.18   | 1.38E-06 | IL18PP, CCR5, CSF2NB2, IL10RA, CCR2, CX3CR1, CSF2NB, IL12B, IL12B, XCR1, CSF2BA                                                                                                                                                                                                                                                                     | 214     | 88        | 13288           | 7.76       | 4.45E-04  | 4.45E-04 | 1.86E-03 |





Table S2.A KEGG pathways significant at 3 hours

| Category     | Term                                            | Count | %    | PValue   | Genes                                                                                                                                                                                                                                                                                                                                                                          | List Total | Pop Hits | Pop Total | Fold Enrichment | Bonferroni | Benjamini | FDR      |
|--------------|-------------------------------------------------|-------|------|----------|--------------------------------------------------------------------------------------------------------------------------------------------------------------------------------------------------------------------------------------------------------------------------------------------------------------------------------------------------------------------------------|------------|----------|-----------|-----------------|------------|-----------|----------|
| KEGG_PATHWAY | mmu04060:Cytokine-cytokine receptor interaction | 49    | 4.52 | 2.96E-10 | OSMR, CXCR2, IL17RA, TGF2, CXCR4, IL1RAP, CSF3R, CSF2RB, IL1B, FAS, IL13RA1, CSF2RA, EGFR, LTBR, INHBB, OSM, TNFRSF10B, PPBP, CCR2, PDGFRA, CXCL1, CSF3, IL1R2, CCL3, IL1R1, CCL2, CSF2RB2, TNFRSF12A, CSF1, CCR1, IL4RA, CXCL2, CXCL9, CCL9, PF4, CNTFR, CCL7, CCL6, CCL24, TNFRSF1A, TNFRSF1B, IL10RA, BMP2, TGFBR1, TGFBR2, CCL11, CXCL14, CXCL16, BMPR1B                   | 434        | 244      | 5738      | 2.66            | 4.88E-08   | 4.88E-08  | 3.59E-07 |
| KEGG_PATHWAY | mmu04512:ECM-receptor interaction               | 25    | 2.31 | 4.36E-09 | TNC, COL3A1, SDC4, SDC2, CD44, COMP, COL6A2, COL6A1, COL11A2, THBS1, THBS2, THBS3, THBS4, SPP1, FN1, TNXB, COL4A1, ITGA3, ITGA4, COL5A2, LAMA4, ITGA5, COL1A2, LAMC2, COL1A1                                                                                                                                                                                                   | 434        | 83       | 5738      | 3.98            | 7.20E-07   | 3.60E-07  | 5.30E-06 |
| KEGG_PATHWAY | mmu04610:Complement and coagulation cascades    | 22    | 2.03 | 7.69E-08 | PLAT, C7, C5AR1, MASP1, C3, C4B, CFB, F13A1, SERPING1, C15, C1QC, PLAUR, C1QA, C1QB, C1RA, THBD, F3, SERPINE1, CFH, CFD, PROS1, PLAU                                                                                                                                                                                                                                           | 434        | 75       | 5738      | 3.88            | 1.27E-05   | 4.23E-06  | 9.33E-05 |
| KEGG_PATHWAY | mmu04510:Focal adhesion                         | 37    | 3.41 | 4.52E-07 | MYL2, PGF, TNC, COL3A1, RAC2, COMP, COL6A2, COL6A1, PIK3R5, ZYX, PAK1, COL11A2, THBS1, THBS2, THBS3, FN1, SPP1, THBS4, ACTB, EGFR, COL4A1, TNXB, ACTN1, ITGA3, ITGA4, FLNC, BIRC3, FLNB, COL5A2, LAMA4, ITGA5, FYN, PDGFRA, COL1A2, RAP1B, LAMC2, COL1A1                                                                                                                       | 434        | 198      | 5738      | 2.47            | 7.45E-05   | 1.86E-05  | 5.48E-04 |
| KEGG_PATHWAY | mmu04210:Apoptosis                              | 22    | 2.03 | 1.18E-06 | CFLAR, IL1R1, CSF2RB2, RELA, NFKBIA, NFKB1, BIRC3, PRKAR2B, TNFRSF1A, IRAK3, TNFRSF10B, MYD88, RIPK1, IL1RAP, CASP8, CASP12, IL1B, CSF2RB, PIK3R5, FAS, APAF1, MAP3K14                                                                                                                                                                                                         | 434        | 87       | 5738      | 3.34            | 1.95E-04   | 3.89E-05  | 1.43E-03 |
| KEGG_PATHWAY | mmu04062:Chemokine signaling pathway            | 33    | 3.04 | 4.28E-06 | CXCL1, ADCY4, CCL3, CCL2, GNAI3, CCR1, CXCL2, CCL9, CXCL9, NFKBIA, NFKB1, CXCR2, PF4, GNG11, CCL7, CCL6, CCL24, RAC2, TIAM1, PTK2B, CXCR4, PIK3R5, PAK1, LYN, RELA, STAT3, STAT2, CCL11, PPBP, CXCL14, CXCL16, CCR2, RAP1B                                                                                                                                                     | 434        | 182      | 5738      | 2.40            | 7.05E-04   | 1.18E-04  | 5.19E-03 |
| KEGG_PATHWAY | mmu04010:MAPK signaling pathway                 | 41    | 3.78 | 1.37E-05 | IL1R2, IL1R1, FGFR3, MRAS, DUSP10, HSPA1A, NFKB1, HSPA1B, TGFB2, FOS, TNFRSF1A, BDNF, RAC2, HSPA2, MAP3K2, MAP3K1, JUND, MAP3K8, IL1B, FAS, PAK1, RAPGEF2, MYC, EGFR, RELA, TGFBR1, TGFBR2, IL1B, FAS, PAK1, RAPGEF2, MYC, EGFR, RELA, TGFBR1, TGFBR2, IL1B, FAS, PAK1, RAPGEF2, MAP4K4, DUSP2, GADD45G, NTRK2, PDGFRA, HSPB1, RAP1B, GADD45B, MAP3K14, GADD45A, CD14, PLA2G4E | 434        | 265      | 5738      | 2.05            | 2.26E-03   | 3.23E-04  | 1.66E-02 |

**Table S2.B KEGG pathways significant at 10 hours**

| Category     | Term                                                | Count | %    | PValue   | Genes                                                                                                                                                                                                                                                                                                                                                                                                                                                                                                                                                                                                                                                                                                                                                                                                                                                                                                                                                                                                                                                                                                                            | ListTotal | PopHits | PopTotal | FoldEnrichment | Bonferroni  | Benjamini | FDR         |
|--------------|-----------------------------------------------------|-------|------|----------|----------------------------------------------------------------------------------------------------------------------------------------------------------------------------------------------------------------------------------------------------------------------------------------------------------------------------------------------------------------------------------------------------------------------------------------------------------------------------------------------------------------------------------------------------------------------------------------------------------------------------------------------------------------------------------------------------------------------------------------------------------------------------------------------------------------------------------------------------------------------------------------------------------------------------------------------------------------------------------------------------------------------------------------------------------------------------------------------------------------------------------|-----------|---------|----------|----------------|-------------|-----------|-------------|
| KEGG_PATHWAY | mmu00190:Oxidative phosphorylation                  | 80    | 2.10 | 8.69E-22 | ATP5D, UQCRC2, ATP5E, COX11, UQCRC1, COX10, ATP5B, CYC1, NDUFA81, UQCRCF51, COX5A, COX5B, UQCRC2, ATP5E, NDUFS6, NDUFS5, UQCRC10, UQCRC11, NDUFA5, NDUFS8, ATP5L, ATP5O, NDUFS3, ATP5H, NDUFS1, ATP5K, ATP5J, COX15, NDUFB10, NDUFC2, COX42, COX411, ATP5V1H, NDUFC1, NDUFA10, COX6C, NDUFA11, ATP6V1A, UQCRCR, ATP5C1, UQCRCB, NDUFB3, NDUFB4, NDUFB5, NDUFB6, NDUFB7, NDUFB8, NDUFB9, COX7B, COX7C, ATP6V1B2, ATP5G1, COX7A2L, ATP5G3, NDUFB2, COX6B1, NDUFA4, NDUFA5, NDUFAZ, ATP5J2, COX7A2, NDUFA3, NDUFA8, COX7A1, COX8B, NDUFA9, NDUFA6, NDUFA7, ATP5F1, NDUFA1, PPA2, SDHA, NDUFV3, SDHB, ATP6V0E2, NDUFV1, SDHC, NDUFV2, SDHD, ATP5A1                                                                                                                                                                                                                                                                                                                                                                                                                                                                                   | 1276      | 130     | 5738     | 2.77           | 1.64E-19    | 1.64E-19  | 1.08E-18    |
| KEGG_PATHWAY | mmu05012:Parkinson's disease                        | 80    | 2.10 | 6.54E-21 | ATP5D, UQCRC2, ATP5E, SNCAIP, UQCRC1, ATP5B, CYC1, NDUFA81, REST, CLTC, COX5A, UQCRCF51, COX5B, UQCRCQ, NDUFS7, GPX1, NDUFS6, AP2B1, NDUFS5, CASP3, UQCRC10, UQCRC11, NDUFS4, PLCB4, CASP8, NDUFS8, CREB3L2, ATP5O, NDUFS3, ATP5H, NDUFS1, ATP5J, NDUFB10, SLC25A4, SLC25A5, CYCS, NDUFC2, COX42, COX411, NDUFC1, NDUFA10, COX6C, UQCRCR, UBC, ATP5C1, UBB, UQCRCB, NDUFB3, NDUFB4, NDUFB5, NDUFB6, NDUFB7, NDUFB8, NDUFB9, COX7B, COX7C, ATP5G1, COX7A2L, ATP5G3, NDUFB2, COX6B1, NDUFA4, NDUFA5, NDUFAZ, COX7A2, NDUFA3, NDUFA8, COX7A1, COX8B, NDUFA9, NDUFA6, NDUFA7, ATP5F1, UBE2L6, VDACC2, VDACC3, NDUFA1, SDHA, NDUFV3, SDHB, NDUFV1, SDHC, NDUFV2, SDHD, AFAF1, ATP5A1                                                                                                                                                                                                                                                                                                                                                                                                                                                  | 1276      | 133     | 5738     | 2.70           | 1.24E-18    | 6.18E-19  | 8.12E-18    |
| KEGG_PATHWAY | mmu05016:Huntington's disease                       | 95    | 2.49 | 1.19E-18 | ATP5D, UQCRC2, ATP5E, UQCRC1, ATP5B, SNCA, CYC1, NDUFA81, UQCRCF51, COX5A, COX5B, UQCRCQ, NDUFS7, NDUFS5, CASP3, UQCRC10, UQCRC11, NDUFS4, PLCB4, CASP8, NDUFS8, CREB3L2, ATP5O, NDUFS3, ATP5H, NDUFS1, ATP5J, NDUFB10, SLC25A4, SLC25A5, TAF4B, CYCS, NDUFC2, COX42, COX411, NDUFC1, NDUFA10, COX6C, UQCRCR, ATP5C1, UQCRCB, NDUFB3, NDUFB4, NDUFB5, NDUFB6, NDUFB7, NDUFB8, NDUFB9, COX7B, COX7C, ATP5G1, COX7A2L, ATP5G3, NDUFB2, POLR2A, TFAM, COX6B1, TGM2, TRP53, NDUFA4, NDUFA5, NDUFAZ, COX7A2, NDUFA3, NDUFA8, COX7A1, COX8B, HTT, NDUFA9, DNALC1, NDUFA6, CREBBP, NDUFA7, ATP5F1, VDACC2, VDACC3, NDUFA1, SOD2, UDUFV3, SDHA, SDHB, SP1, BBC3, NDUFV1, SDHC, BAX, NDUFV2, SDHD, AFAF1, ATP5A1                                                                                                                                                                                                                                                                                                                                                                                                                          | 1276      | 183     | 5738     | 2.33           | 2.24E-16    | 7.48E-17  | 1.47E-15    |
| KEGG_PATHWAY | mmu05010:Alzheimer's disease                        | 93    | 2.44 | 1.09E-17 | SDHB, LRP1, ATP2A2, ATP2A3, NDUFV1, SDHC, NDUFV2, CASP12, SDHD, AFAF1, ATP5A1, CALM2, PDGFR, PDGFA, PGF, BCAR1, CHAD, VCL, ACTG1, ARHGAP5, PAK2, PAK4, SHC1, ZYX, COL11A2, COL11A1, PRKCA, EGFR, PARVG, ACTN4, BRAF, ROCK1, ROCK2, ACTN1, ACTN2, FLNC, FLNB, FLNA, VASP, VEGFB, CCND1, CCND2, JUN, VEGFA, COL1A2, PDGFR, LAMC2, LAMC1, COL1A1, CAV3, IBSP, MYL2, TNC, COL3A1, ITGB1, ITGB1, PKN, MYL9, IGF1R, DOCK1, LAMB2, RAC2, COMP, ITGB7, ITGB6, COL6A2, PPP1R12A, COL6A1, PIK3R5, THBS1, THBS2, PIK3R1, THBS3, FN1, THBS4, SPP1, PIK3R2, ACTB, COL4A2, COL4A1, FLT1, TNXB, MET, BIRC3, CAPN2, COL5A2, VAV1, KDR, VWF, LAMA4, ITGA5, GRLF1, RAP1B, DIAP1                                                                                                                                                                                                                                                                                                                                                                                                                                                                    | 1276      | 182     | 5738     | 2.30           | 2.07E-15    | 5.17E-16  | 1.36E-14    |
| KEGG_PATHWAY | mmu04510:focal adhesion                             | 82    | 2.15 | 1.46E-09 | DIET, AC02, SUCLA1, CS, IDH3B, ACYL, DIAT, ODGH, PDHB, IDH3A, SDHA, SDHB, IDH3G, SDHC, DLD, SDHD, IDH2, IDH1, PDHA1, FHL1, SUCLA2, MDH2, MDH1                                                                                                                                                                                                                                                                                                                                                                                                                                                                                                                                                                                                                                                                                                                                                                                                                                                                                                                                                                                    | 1276      | 198     | 5738     | 1.86           | 2.76E-07    | 5.53E-08  | 1.82E-06    |
| KEGG_PATHWAY | mmu00020:Citrate cycle (TCA cycle)                  | 23    | 0.60 | 8.98E-09 | UQCRC2, ATP1B1, UQCRC1, MYL2, ATP1B3, TNNC1, MYL3, ATP1B4, CYC1, COX7B, COX7C, CACNB1, COX7A2L, UQCRCF51, COX5A, COX5B, UQCRCQ, TPM4, TPM3, UQCRC10, UQCRC11, COX6B1, ACTC1, SLC8A1, COX7A2, COX8B, COX7A1, COX42, COX411, MYH7, ATP1A1, COX6C, CACNA2D4, ATP2A2, UQCRCR, UQCRCB, SLC9A1                                                                                                                                                                                                                                                                                                                                                                                                                                                                                                                                                                                                                                                                                                                                                                                                                                         | 1276      | 31      | 5738     | 3.34           | 1.70E-06    | 2.83E-07  | 1.11E-05    |
| KEGG_PATHWAY | mmu04260:Cardiac muscle contraction                 | 37    | 0.97 | 2.11E-06 | IBSP, TNC, NPNT, COL3A1, COL2A1, SDC4, ITGB1, SDC2, CHAD, LAMB2, CD44, COMP, ITGB7, ITGB6, COL6A2, COL6A1, AGRN, COL11A2, THBS1, COL11A1, THBS2, THBS3, FN1, SPP1, THBS4, COL4A2, COL4A1, TNXB, COL5A2, VWF, LAMA4, SDC1, CD36, ITGA5, COL11A2, LAMC2, LAMC1, COL1A1, BCAT2, EHHADH, ECHS1, ACAT1, HADHA, HIBADH, AUH, HADHB, MCCC2, MUT, MCEE, OXCT1, MCC1, ACAD8, HADH, HMGC1, BCKDHA, ACAA2, ACADM, ACADS, DBT, DLD, AOX1, HIBCH, PCCA FGF7, PDGFR, PDGFA, TGFBR3, NFKB2, TGFBR1, PRKX, TGFBR2, MAP3K6, FOS, CASP3, MAP3K5, PAK2, BZ30120H23BK, MAP3K8, FAS, RARGP2, FGF2, MYC, CHUK, MAP2K6, PRKCA, EGFR, BRAF, REL, RELB, PTPRR, ECTS, FLNC, FLNB, FLNA, STK3, MAP4K3, MAP4K4, RASGRF2, ARRB2, RRS2, JUN, GADD45G, PDGFR, HSPB1, MAPK7, MAP3K14, GADD45B, GADD45A, ILIR2, ILIR1, FGF3, MKNK2, DUSP10, MAP4K2, CACNB1, HSPA1A, GNG12, HSPA1B, TNFRSF1A, KRAS, HSPA2, RASGRP3, RAC2, ELK4, MAP3K2, PLA2G12A, JUN, RASGRP2, HSPA8, RASA2, PTPN7, TRP53, TGFBR1, TGFBR2, NR4A1, MAPK11, TAB1, CACNA2D4, RPS6KA5, DUSP5, NRAS, DUSP4, ATF4, PLA2G4A, RPS6KA3, DUSP2, RPS6KA4, DUSP1, RPS6KA2, NTRK2, RAP1B, PLA2G4B, CD14, DUSP7 | 1276      | 78      | 5738     | 2.13           | 3.99E-04    | 5.70E-05  | 0.002622723 |
| KEGG_PATHWAY | mmu04512:ECM-receptor interaction                   | 38    | 1.00 | 4.27E-06 | ITGAL, GNAI3, MYL2, GNAI2, MMP9, BCAR1, CLDN5, ITGB2, ITGB1, MMP2, PXN, ITGAM, VCL, MYL9, ACTG1, ARHGAP5, EZR, RAC2, PTK2B, PIK3R5, MSN, PIK3R1, MLLT4, PIK3R2, ACTB, PRKCA, ICAM1, ACTN4, ROCK1, NCF2, NCF1, ROCK2, NCF4, ACTH1, ACTH2, MAPK11, CTNNA1, VAV1, VASP, THY1                                                                                                                                                                                                                                                                                                                                                                                                                                                                                                                                                                                                                                                                                                                                                                                                                                                        | 1276      | 83      | 5738     | 2.06           | 8.06E-04    | 1.01E-04  | 0.005297508 |
| KEGG_PATHWAY | mmu00280:Valine, leucine and isoleucine degradation | 25    | 0.66 | 7.94E-06 | CYBA, CYBB, RASSF5, PLCG2, GRLF1, RAP1B, JAM2, PDGFR, PGF, PDGFA, MMP9, TGFBR3, FOXO1, MMP2, TGFBR1, TGFBR2, SLC2A1, RALB, CSF3R, RARA, FAS, RARB, EGFR, RET, BCR, BRAF, RPLA, RARG, CTNNA1, VEGFB, JUP, HIF1A, JUN, VEGFA, PDGFR, LAMC2, LAMC1, WNT5A, FGF3, SFP1, BCL2L1, ITGB1, KRAS, LAMB2, RAC2, FH1, RUNX1, AXIN2, CSF1R, FN1, AXIN1, TRP53, BMP4, TCF7, BMP2, EPAS1, TGFBR1, MET, CREBBP, TGFBR2, SMAD3, CBLB, LAMA4, CDKN1A, PLCG2, PPARA, FGF7, NFKB2, FOS, CCNE1, CASP3, CASP8, FGF2, MYC, CSF2RA, CHUK, PRKCA, AR, HSP90A1, CYCS, CDK4, SMO, CCND1, MDM2, WNT11, WNT5A, BID, PML, KIT, TPM3, IGF1R, PIK3R5, PIK3R1, PIK3R2, CEBPA, IL6, COL4A2, COL4A1, MSH2, FZD1, BIRC3, FZD5,                                                                                                                                                                                                                                                                                                                                                                                                                                      | 1276      | 46      | 5738     | 2.44           | 0.001499078 | 1.67E-04  | 0.009856236 |
| KEGG_PATHWAY | mmu04010:MAPK signaling pathway                     | 90    | 2.36 | 9.02E-06 | ITGAL, GNAI3, MYL2, GNAI2, MMP9, BCAR1, CLDN5, ITGB2, ITGB1, MMP2, PXN, ITGAM, VCL, MYL9, ACTG1, ARHGAP5, EZR, RAC2, PTK2B, PIK3R5, MSN, PIK3R1, MLLT4, PIK3R2, ACTB, PRKCA, ICAM1, ACTN4, ROCK1, NCF2, NCF1, ROCK2, NCF4, ACTH1, ACTH2, MAPK11, CTNNA1, VAV1, VASP, THY1                                                                                                                                                                                                                                                                                                                                                                                                                                                                                                                                                                                                                                                                                                                                                                                                                                                        | 1276      | 265     | 5738     | 1.53           | 0.001703641 | 1.70E-04  | 0.011202286 |
| KEGG_PATHWAY | mmu04670:Leukocyte transendothelial migration       | 47    | 1.23 | 3.16E-05 | CYBA, CYBB, RASSF5, PLCG2, GRLF1, RAP1B, JAM2, PDGFR, PGF, PDGFA, MMP9, TGFBR3, FOXO1, MMP2, TGFBR1, TGFBR2, SLC2A1, RALB, CSF3R, RARA, FAS, RARB, EGFR, RET, BCR, BRAF, RPLA, RARG, CTNNA1, VEGFB, JUP, HIF1A, JUN, VEGFA, PDGFR, LAMC2, LAMC1, WNT5A, FGF3, SFP1, BCL2L1, ITGB1, KRAS, LAMB2, RAC2, FH1, RUNX1, AXIN2, CSF1R, FN1, AXIN1, TRP53, BMP4, TCF7, BMP2, EPAS1, TGFBR1, MET, CREBBP, TGFBR2, SMAD3, CBLB, LAMA4, CDKN1A, PLCG2, PPARA, FGF7, NFKB2, FOS, CCNE1, CASP3, CASP8, FGF2, MYC, CSF2RA, CHUK, PRKCA, AR, HSP90A1, CYCS, CDK4, SMO, CCND1, MDM2, WNT11, WNT5A, BID, PML, KIT, TPM3, IGF1R, PIK3R5, PIK3R1, PIK3R2, CEBPA, IL6, COL4A2, COL4A1, MSH2, FZD1, BIRC3, FZD5,                                                                                                                                                                                                                                                                                                                                                                                                                                      | 1276      | 119     | 5738     | 1.78           | 0.005957607 | 5.43E-04  | 0.039252385 |
| KEGG_PATHWAY | mmu05200:Pathways in cancer                         | 103   | 2.70 | 3.93E-05 | STAT3, RALGDS, NRAS, HSP90B1, RASSF5, BAX, RASSF1, JAK1                                                                                                                                                                                                                                                                                                                                                                                                                                                                                                                                                                                                                                                                                                                                                                                                                                                                                                                                                                                                                                                                          | 1276      | 323     | 5738     | 1.43           | 0.007403353 | 6.19E-04  | 0.04881099  |

Table S2.C KEGG pathways significant at 24 hours

| Category     | Term                                      | Count | %    | PValue   | Genes                                                                                                                                                                                                                                                                                                                                                                                                                                                                                                                                                                                                                                                                                                                                                                                                                                                                                                                                                                                                                                                                                                                                                                        | List Total | Pop Hits | Pop Total | Fold Enrichment | Bonferroni  | Benjamini | FDR         |
|--------------|-------------------------------------------|-------|------|----------|------------------------------------------------------------------------------------------------------------------------------------------------------------------------------------------------------------------------------------------------------------------------------------------------------------------------------------------------------------------------------------------------------------------------------------------------------------------------------------------------------------------------------------------------------------------------------------------------------------------------------------------------------------------------------------------------------------------------------------------------------------------------------------------------------------------------------------------------------------------------------------------------------------------------------------------------------------------------------------------------------------------------------------------------------------------------------------------------------------------------------------------------------------------------------|------------|----------|-----------|-----------------|-------------|-----------|-------------|
| KEGG_PATHWAY | mmu00190:Oxidative phosphorylation        | 76    | 1.88 | 2.71E-17 | ATP5D, UQCRC2, ATP5E, COX11, COX10, UQCRCF1, COX5A, COX5B, NDUFS7, NDUFS6, NDUFS5, UQCRC10, UQCRC11, NDUFS4, CASP9, APOE, CASP8, NDUFS8, IL1B, ATP5O, NDUFS3, ATP5H, COX17, NDUFS1, ATP5K, ATP5I, NDUFB10, NDUFC2, ATP6V1H, NDUFC1, NDUFA10, ATP6V1D, COX6C, NDUFA11, ATP6V1A, UQCRC4, ATP5C1, UQCRC8, NDUFB3, NDUFB4, NDUFB5, NDUFB6, NDUFB7, NDUFB8, NDUFB9, COX7B, COX7C, ATP5G2, ATP6V1B2, ATP5G1, ATP6V1G1, COX7A2L, NDUFB2, NDUFB6, COX6B1, TCIRG1, NDUFA4, NDUFA5, NDUFA2, ATP5J2, COX7A2, NDUFA3, NDUFA8, COX7A1, COX8B, NDUFA9, NDUFA6, NDUFA7, ATP5F1, LHPP, NDUFA1, PPA2, NDUFV3, ATP6V0E2, ATP6V1E1, SDHC, NDUFV2, SDHD, COX6A2                                                                                                                                                                                                                                                                                                                                                                                                                                                                                                                                  | 1355       | 130      | 5738      | 2.48            | 5.15E-15    | 5.15E-15  | 3.37E-14    |
| KEGG_PATHWAY | mmu05010:Alzheimer's disease              | 87    | 2.15 | 1.15E-12 | ATP5D, UQCRC2, ATP5E, IDE, COX5A, UQCRCF1, COX5B, NDUFS7, NDUFS6, NDUFS5, APP, CASP3, UQCRC10, UQCRC11, NDUFS4, CASP9, APOE, CASP8, NDUFS8, IL1B, ATP5O, NDUFS3, ATP5H, PLCB2, NDUFS1, ATP5J, NDUFB10, ADAM10, CYCS, NDUFC2, FADD, NDUFC1, NDUFA10, COX6C, UQCRC4, ATP5C1, ERN1, GM12070, EIF2AK3, UQCRC8, BID, NDUFB3, NDUFB4, HSD17B10, NDUFB5, NDUFB6, NDUFB7, NDUFB8, NDUFB9, COX7B, COX7C, MME, ATP5G2, ATP5G1, COX7A2L, NDUFB2, TNFRSF1A, COX6B1, PPP3CB, PPP3CA, GAPDH, NDUFA4, NDUFA5, NDUFA2, COX7A2, NDUFA3, NOS1, NDUFA8, COX7A1, COX8B, NDUFA9, NDUFA6, NDUFA7, ATP5F1, CAPN2, NDUFA1, ITPR1, CAPN1, ATF6                                                                                                                                                                                                                                                                                                                                                                                                                                                                                                                                                        | 1355       | 182      | 5738      | 2.02            | 2.19E-10    | 1.09E-10  | 1.43E-09    |
| KEGG_PATHWAY | mmu05012:Parkinson's disease              | 69    | 1.70 | 3.01E-12 | SDHC, NDUFV2, SDHD, COX6A2, APAF1                                                                                                                                                                                                                                                                                                                                                                                                                                                                                                                                                                                                                                                                                                                                                                                                                                                                                                                                                                                                                                                                                                                                            | 1355       | 133      | 5738      | 2.20            | 5.72E-10    | 1.91E-10  | 3.74E-09    |
| KEGG_PATHWAY | mmu05016:Huntington's disease             | 86    | 2.12 | 5.05E-12 | HDAC1, BBK1, BAX, NDUFV2, SDHD, COX6A2, APAF1                                                                                                                                                                                                                                                                                                                                                                                                                                                                                                                                                                                                                                                                                                                                                                                                                                                                                                                                                                                                                                                                                                                                | 1355       | 183      | 5738      | 1.99            | 9.59E-10    | 2.40E-10  | 6.27E-09    |
| KEGG_PATHWAY | mmu04210:Apoptosis                        | 45    | 1.11 | 3.39E-08 | ENDOD, RIFK1, BAX, PRKAR1A, APAF1, MAP3K14, IL3RA                                                                                                                                                                                                                                                                                                                                                                                                                                                                                                                                                                                                                                                                                                                                                                                                                                                                                                                                                                                                                                                                                                                            | 1355       | 87       | 5738      | 2.19            | 6.44E-06    | 1.29E-06  | 4.21E-05    |
| KEGG_PATHWAY | mmu04920:Adipocytokine signaling pathway  | 35    | 0.86 | 1.12E-06 | PRKAG3, NFKBIE, STK11, NFKBIA, CAMKK1, CAMKK2, AKT1, TNFRSF1A, TNFRSF1B, SLC2A4, SLC2A1, PRKAA1, PRKAA2, ACSL3, CHUK, ACSL6, ACSL5, AKT2, CPT1B, SOCS3, RXRA, REL, PRKAB2, PRKAB1, RXRG, ADIPOR1, ACAC3, ADIPOQ, IRS1, CPT1A, STAT3, TRADD, PRKCC, NPY, JAK2, MARKSKL1, WASF2, ASAP1, ARPC4, ARFG, ARPC5, AKT3, DOCK2, RAC2, ARPC2, GAB2, ARPC2, GSN, PIKFYVE, PIK3R5, INPP5D, PAK1, AKT2, PRKCA, PIK3CG, PTPRC, VAV3, LYN, PPA2C, LIMK1, NCF1, HCK, SHPK2, PRKCE, FCGR1, WAS, VAV1, PRKCD, VASP, PRKCB, ARPC1B, PLA2G4A, FCGR2B, ARPCS, CFL1, PLCG2, SCIN, MARCKS, PLA2G4E                                                                                                                                                                                                                                                                                                                                                                                                                                                                                                                                                                                                  | 1355       | 67       | 5738      | 2.21            | 2.13E-04    | 3.55E-05  | 0.001393144 |
| KEGG_PATHWAY | mmu04666:Fc gamma R-mediated phagocytosis | 44    | 1.09 | 6.54E-06 | ADCY2, ADCY7, PREX1, STAT5B, CXCR2, PRKX, AKT1, TIAM2, CXCR4, TIAM1, RHOA, PRKACA, SHC1, PAK1, CSK, PLCB2, CHUK, AKT2, PIK3CG, LYN, NCF1, REL, WAS, PRKCD, HRAS1, PRKCB, ELMO1, GNB2, PPP8R, CCR5, ARRB2, GNB1, CCR2, CXCR1, GNB5, CXCL1, PARD3, CCL3, GNAI3, CCL2, GNAI2, FGR, CCR1, CCL9, NFKBIA, CCL8, PF4, CCL7, CCL6, CCL24, CCL25, DOCK2, KRAS, RAC2, PTK2B, SOS2, PIK3R5, VAV3, HCK, VAV1, STAT3, STAT2, NRAS, CCL12, CXCL14, GNG10, CXCL16, JAK2, RAP1B, GRK5, BID, STEAP3, CHEK1, SFN, RRM2B, PMAIP1, SESN2, CCNG2, CCNE1, CASP3, CASP9, SHISAS, SERPINE1, CASP8, THBS1, TRPS3, CDK1, CYCS, CDK6, CDK4, CDK2, RFWO2, CCND1, CDKN1A, EIZ4, BBK3, CCND2, CD82, RRM2, BAX, GADD45G, APAF1, GADD45A                                                                                                                                                                                                                                                                                                                                                                                                                                                                     | 1355       | 98       | 5738      | 1.90            | 0.001241374 | 1.77E-04  | 0.00812502  |
| KEGG_PATHWAY | mmu04062:Chemokine signaling pathway      | 70    | 1.73 | 7.95E-06 | PIK3R5, VAV3, HCK, VAV1, STAT3, STAT2, NRAS, CCL12, CXCL14, GNG10, CXCL16, JAK2, RAP1B, GRK5, BID, STEAP3, CHEK1, SFN, RRM2B, PMAIP1, SESN2, CCNG2, CCNE1, CASP3, CASP9, SHISAS, SERPINE1, CASP8, THBS1, TRPS3, CDK1, CYCS, CDK6, CDK4, CDK2, RFWO2, CCND1, CDKN1A, EIZ4, BBK3, CCND2, CD82, RRM2, BAX, GADD45G, APAF1, GADD45A                                                                                                                                                                                                                                                                                                                                                                                                                                                                                                                                                                                                                                                                                                                                                                                                                                              | 1355       | 182      | 5738      | 1.63            | 0.001508532 | 1.89E-04  | 0.009874856 |
| KEGG_PATHWAY | mmu04115:p53 signaling pathway            | 34    | 0.84 | 8.49E-06 | BBK3, CCND2, CD82, RRM2, BAX, GADD45G, APAF1, GADD45A                                                                                                                                                                                                                                                                                                                                                                                                                                                                                                                                                                                                                                                                                                                                                                                                                                                                                                                                                                                                                                                                                                                        | 1355       | 69       | 5738      | 2.09            | 0.001611612 | 1.79E-04  | 0.010550125 |
| KEGG_PATHWAY | mmu00230:Purine metabolism                | 62    | 1.53 | 1.10E-05 | GDA, ADCY2, GMPR2, ADCY7, PDE3B, PRM1, PRM2, NTSM, NTS5C3, PDE4A, PRIM2, NTS5C2, IMPDH1, NTS5, NTS5, NUDT2, POLR1E, NUDT5, PDE4D, PDE10A, POLR1B, GMPR, NME1, ADK, RRM2, ADSL, PRPS2, XDH, POLR2H, ADSS, ENPP1, POLR2K, NTS5C1A, POLR2L, POLA1, DCK, RRM2B, PFAS, ADA, POLR2A, POLE2, PDE1B, ATIC, NUDT9, ENTPD4, ENTPD1, PAPS1, PAPS2, ADSL1, AK1, POLR3GL, NPR2, AMPD2, AMPD1, APRT, POLR3D, AMPD1, POLD1, PDE7B, PDE2A, POLD1, PAICS, PFCS2, POF, MAMP, STATS5B, FGF13, TGFBI, WNT4, SLC2A1, RALB, CSF1R, RARA, RARB, EGFR, PIK3CG, BCR, RXBA, REL, RXRG, SEK2, FADD, CTNNA1, STK4, CTNNA3, HRAS1, VEGFB, CCDC6, HIF1A, VEGFA, PDGFRA, LAMC2, TRAF1, NFKBIA, SFP1, BCL2L1, ITGB1, RBX1, LAMB2, KRAS, RAC2, FHL1, RUNX1, CSF1R, FNI, TRP53, BMP2, EPAS1, MAP2K2, SMAD3, ITGA3, CDKN1A, CDKN1B, HDAC1, PLCG2, E2F1, PPARG, NFKB2, AKT1, ACVR1B, CCNE1, FOS, CASP3, CASP9, CASP8, RHOA, MYC, CHUK, CSF2RA, AKT2, PRKCA, AR, HSP90AA1, CYCS, CDK6, CDK4, CDK2, PRKCB, DAPK1, SMO, CCND1, WNT1, WNT9A, BID, CCK1B, PML, EGR2, HIF1, ZBTB16, TRAF3, IGF1R, BCL2, SOS2, PIK3R5, CEBPA, IL6, CDL4A2, CDL4A1, VHL, CBL, BIRC3, FZD5, FZD4, STAT3, FZD7, NRAS, HSP90B1, RASSF5, BAK | 1355       | 157      | 5738      | 1.67            | 0.00208012  | 2.08E-04  | 0.013620114 |
| KEGG_PATHWAY | mmu05200:Pathways in cancer               | 109   | 2.69 | 2.31E-05 | RASSF1, ARAF                                                                                                                                                                                                                                                                                                                                                                                                                                                                                                                                                                                                                                                                                                                                                                                                                                                                                                                                                                                                                                                                                                                                                                 | 1355       | 323      | 5738      | 1.43            | 0.004375503 | 3.99E-04  | 0.028680546 |



Table S2.D KEGG pathways significant at 48 hours

| Category     | Term                                                | Count | % | PValue | Genes                                                                                                                                                                                                                                                                                                                                                                                                                                                                                                                                                                                                                           | List Total | Pop Hits | Pop Total | Fold Enrichment | Bonferroni  | Benjamini | FDR         |
|--------------|-----------------------------------------------------|-------|---|--------|---------------------------------------------------------------------------------------------------------------------------------------------------------------------------------------------------------------------------------------------------------------------------------------------------------------------------------------------------------------------------------------------------------------------------------------------------------------------------------------------------------------------------------------------------------------------------------------------------------------------------------|------------|----------|-----------|-----------------|-------------|-----------|-------------|
| KEGG_PATHWAY | mmu00280:Valine, leucine and isoleucine degradation | 28    |   | 1.30   | 2.79E-12<br>ALDH9A1, PCCA                                                                                                                                                                                                                                                                                                                                                                                                                                                                                                                                                                                                       | 820        | 46       | 5738      | 4.26            | 4.99E-10    | 4.99E-10  | 3.43E-09    |
| KEGG_PATHWAY | mmu05010:Alzheimer's disease                        | 55    |   | 2.56   | 4.10E-08<br>UQCRC2, UQCRC1, CYC1, NDUFB1, UQCRCF51, NDUFS7, CASP3, NDUFA5, UQCRC11, CASP9, APOE, NDUFS8, CASP8, IL1B, NDUFS3, PLCB2, NDUFS2, NDUFS1, ADAM10, NDUFB10, CYCS, NDUFC1, NDUFA10, ATP5C1, UQCRC8, NDUFB3, BID, CDK5R1, TM4SF19, NDUFB8, NDUFB9, NDUFB2, TNFRSF1A, PPP3CB, PPP3CA, LPL, NDUFA5, NOS1, COX7A1, COX8B, NDUFA8, NDUFA9, NDUFA6, CACNA1S, SDHA, NDUFV3, SDHB, LRP1, ATP2A2, NDUFV1, SDHC, NDUFV2, COX6A2, COX6A1, APAF1                                                                                                                                                                                   | 820        | 182      | 5738      | 2.11            | 7.33E-06    | 3.67E-06  | 5.04E-05    |
| KEGG_PATHWAY | mmu05012:Parkinson's disease                        | 44    |   | 2.05   | 6.92E-08<br>UQCRC2, NDUFB3, UQCRC1, NDUFB8, NDUFB9, CYC1, UCHL1, NDUFB1, PINK1, UQCRCF51, NDUFB2, NDUFS7, CASP3, UQCRC11, NDUFA4, CASP9, NDUFS8, NDUFS3, NDUFS2, NDUFS1, NDUFA5, NDUFB10, NDUFA8, COX8B, COX7A1, NDUFA9, SLC25A5, NDUFA6, CYCS, NDUFC1, NDUFA10, VDCA3, VDCA1, NDUFV3, SDHA, SDHB, NDUFV1, SDHC, NDUFV2, COX6A2, ATP5C1, COX6A1, APAF1, UQCRC8, ITGAL, GNAI3, MYL2, GNAI2, MMP9, ITGB2, ITGAM, VCL, ACTG1, VCAM1, EZR, RAC2, PTK2B, CXCR4, RHOA, PIK3R5, MSN, RHOH, ACTB, PRKCA, PIK3CG, ICAM1, VAV3, NCF2, ACTN4, NCF1, NCF4, ACTN1, MYL12B, VAV1, VASP, THY1, PRKCB, CYBA, CYBB, RASSF5, MAPK12, PLCG2, RAP1B | 820        | 133      | 5738      | 2.31            | 1.24E-05    | 4.13E-06  | 8.52E-05    |
| KEGG_PATHWAY | mmu04670:Leukocyte transendothelial migration       | 39    |   | 1.81   | 5.77E-07<br>UQCRC2, NDUFB3, UQCRC1, NDUFB8, NDUFB9, CYC1, NDUFB1, UQCRCF51, NDUFB2, NDUFS7, ATP5C1, UQCRC11, NDUFA4, NDUFS8, NDUFS3, NDUFS2, NDUFS1, ATP5K, TCIRG1, NDUFA5, NDUFB10, NDUFA8, COX8B, COX7A1, NDUFA9, SDHC, NDUFV2, COX6A2, ATP5C1, COX6A1, NDUFA10, NDUFV3, SDHA, SDHB, ATP6V1A, ATP6V0E2, NDUFV1, SDHC, NDUFV2, COX6A2, ATP5C1, COX6A1, UQCRCB, SUCLG1, CS, IDH3B, ACLY, DLAT, OGDH, IDH3A, SDHA, SDHB, IDH3G, SDHC, DLD, IDH2, PDHA1, FH1, SUCLA2, MDH1                                                                                                                                                        | 820        | 119      | 5738      | 2.29            | 1.03E-04    | 2.58E-05  | 7.10E-04    |
| KEGG_PATHWAY | mmu00190:Oxidative phosphorylation                  | 41    |   | 1.91   | 8.65E-07<br>MARKS11, ARPC4, ARFG, ARPC5, DOCK2, RAC2, ARPC3, GAB2, ARPC2, PIK3R5, INPP5D, PIK3CG, PRKCA, PTPRC, VAV3, LYN, PPA2C, NCF1, LMK1, HCK, SPHK1, VAV1, PRKCD, WAS, FCGR1, VASP, PRKCB, ARPC1B, PLA2G4A, FCGR2B, CFL1, PLCG2, MARCKS                                                                                                                                                                                                                                                                                                                                                                                    | 820        | 130      | 5738      | 2.21            | 1.55E-04    | 3.10E-05  | 0.001065029 |
| KEGG_PATHWAY | mmu00020:Citrate cycle (TCA cycle)                  | 17    |   | 0.79   | 9.45E-07<br>SUCLA2, MDH1                                                                                                                                                                                                                                                                                                                                                                                                                                                                                                                                                                                                        | 820        | 31       | 5738      | 3.84            | 1.69E-04    | 2.82E-05  | 0.001162609 |
| KEGG_PATHWAY | mmu04666:Fc gamma R-mediated phagocytosis           | 33    |   | 1.53   | 2.63E-06<br>ADCY7, STAT5B, CXCR2, PRKX, CXCR4, RHOA, CSK, PLCB2, PIK3CG, LYN, NCF1, PRKCD, WAS, ELMO1, PRKCB, CCR5, PPBP, ARRB2, GNB1, CX3CR1, CCR2, GNAI3, CCL2, GNAI2, FGR, CCR1, CCL9, CCL8, PF4, CCL4, CCL7, CCL6, DOCK2, RAC2, PTK2B, SOS2, PIK3R5, VAV3, HCK, VAV1, STAT3, NRAS, ADCY9, CXCL14, CXCL13, CXCL16, GNG10, JAK2, RAP1B                                                                                                                                                                                                                                                                                        | 820        | 98       | 5738      | 2.36            | 4.71E-04    | 6.72E-05  | 0.0032361   |
| KEGG_PATHWAY | mmu04062:Chemokine signaling pathway                | 49    |   | 2.28   | 9.62E-06<br>UQCRC2, CLTA, UQCRC1, CYC1, NDUFB1, UQCRCF51, NDUFS7, GPX1, CASP3, NDUFA5, UQCRC11, CASP9, NDUFS8, CASP8, NDUFS3, PLCB2, NDUFS2, NDUFS1, NDUFB10, SLC25A5, CYCS, NDUFC1, NDUFA10, ATP5C1, UQCRC8, NDUFB3, NDUFB8, NDUFB9, NDUFB2, TRP53, NDUFA5, COX7A1, COX8B, NDUFA8, NDUFA9, NDUFA6, VDCA3, SOD2, VDCA1, SDHA, NDUFV3, SDHB, BAX, SDHC, NDUFV1, NDUFV2, COX6A2, COX6A1, APAF1                                                                                                                                                                                                                                    | 820        | 182      | 5738      | 1.88            | 0.001720856 | 2.15E-04  | 0.011840157 |
| KEGG_PATHWAY | mmu05016:Huntington's disease                       | 49    |   | 2.28   | 1.13E-05<br>ALDH6A1, LDHB, ACADM, SUCLG1, ECHS1, ACAT1, HADHA, MUT, ACS1, MCEE, ALDH2, SUCLA2, PCCB, ALDH9A1, PCCA                                                                                                                                                                                                                                                                                                                                                                                                                                                                                                              | 820        | 183      | 5738      | 1.87            | 0.002020134 | 2.25E-04  | 0.013901248 |
| KEGG_PATHWAY | mmu00640:Propanoate metabolism                      | 15    |   | 0.70   | 2.05E-05                                                                                                                                                                                                                                                                                                                                                                                                                                                                                                                                                                                                                        | 820        | 30       | 5738      | 3.50            | 0.003656954 | 3.66E-04  | 0.025184004 |



|              |                                   |    |      |          |                                                                                                                                                                                                                                                                                                                                                             |      |    |      |      |             |          |             |
|--------------|-----------------------------------|----|------|----------|-------------------------------------------------------------------------------------------------------------------------------------------------------------------------------------------------------------------------------------------------------------------------------------------------------------------------------------------------------------|------|----|------|------|-------------|----------|-------------|
| KEGG_PATHWAY | mmu05212:Pancreatic cancer        | 47 | 0.65 | 9.20E-06 | E2F1, E2F2, PGF, NFKB1, BCL2L1, TGFBI, TGFBI2, AKT1, ACVR1B, RAC2, CASP9, RAC3, RALB, RALA, PIK3CA, PIK3RS, EGF, FIGF, AKT3, AKT2, PIK3CG, TRP53, EGFR, PLD1, RELA, ARHGGEF6, TGFBR1, PIK3CD, TGFBR2, SMAD4, RAF1, BRCA2, SMAD3, CDK6, STAT1, CDK4, STAT3, RALGDS, RADS1, VEGFB, CCND1, ARAF, VEGFA, MAPK3, MAPK9, MAPK8, IKBKB                             | 2203 | 72 | 5738 | 1.70 | 0.001774079 | 9.86E-05 | 0.011463648 |
| KEGG_PATHWAY | mmu05210:Colorectal cancer        | 53 | 0.73 | 2.43E-05 | TGFBI, TGFBI2, AKT1, FOS, ACVR1B, CASP3, CASP9, PIK3CA, MYC, AKT3, AKT2, EGFR, PIK3CG, PIK3CD, CYCS, CCND1, JUN, MAPK3, PDGFRA, MAPK9, MAPK8, GRB2, TCF7L2, RAC2, RAC3, SOS1, BCL2, SOS2, PIK3RS, DVL2, FZD9, TRP53, TCF7, MSH3, MSH2, TGFBR1, TGFBR2, SMAD4, FZD1, RAF1, SMAD3, BIRC5, FZD2, FZD5, APPL1, FZD4, FZD7, RALGDS, FZD6, DVL1, BAX, GSK3B, ARAF | 2203 | 86 | 5738 | 1.61 | 0.004670485 | 2.46E-04 | 0.030220506 |
| KEGG_PATHWAY | mmu05220:Chronic myeloid leukemia | 48 | 0.67 | 2.60E-05 | E2F1, E2F2, GRB2, STAT5B, NFKBIA, NFKB1, BCL2L1, TGFBI, TGFBI2, AKT1, ACVR1B, GAB2, SOS1, SOS2, PIK3CA, SHC1, PIK3RS, RUXN1, MYC, AKT3, AKT2, PIK3CG, TRP53, CTBP1, BCR, MAP2K2, RELA, TGFBR1, CBL, PIK3CD, TGFBR2, SMAD4, RAF1, SMAD3, CDK6, MECOM, CDK4, PTPN11, HRAS1, NRAS, CCND1, CDKN1A, HDAC2, HDAC1, ARAF, MAPK3, MDM2, IKBKB                       | 2203 | 76 | 5738 | 1.65 | 0.005013764 | 2.51E-04 | 0.032446929 |

**Table S2.F KEGG pathways significant at 168 hours**

| Category     | Term                                               | Count | % | PValue | Genes                                                                                                                                 | List Total | Pop Hits | Pop Total | Fold Enrichment | Bonferroni  | Benjamini | FDR         |
|--------------|----------------------------------------------------|-------|---|--------|---------------------------------------------------------------------------------------------------------------------------------------|------------|----------|-----------|-----------------|-------------|-----------|-------------|
| KEGG_PATHWAY | mmu04062:Chemokine signaling pathway               | 18    |   | 0.65   | 4.47E-07<br>CCL2, FGR, NCF1, HCK, CCL9, CCL8, WAS, CCL7, CCL17, PRKCB, CCL12, CCR5, RAC2, CCR2, CX3CR1, PIK3RS, XCL1, XCR1            | 129        | 182      | 5738      | 4.40            | 4.78E-05    | 4.78E-05  | 5.02E-04    |
| KEGG_PATHWAY | mmu04670:Leukocyte transendothelial migration      | 14    |   | 0.50   | 1.93E-06<br>NCF2, NCF1, NCF4, ITGB2, PRKCB, VCAM1, CYBA, CYBB, EZR, RAC2, PLCG2, CLDN2, PIK3RS, RHOH                                  | 129        | 119      | 5738      | 5.23            | 2.06E-04    | 1.03E-04  | 0.002168346 |
| KEGG_PATHWAY | mmu04650:Natural killer cell mediated cytotoxicity | 13    |   | 0.47   | 1.46E-05<br>BID, FCGR4, ITGB2, NCR1, PRKCB, FCGR3, CD48, RAC2, PLCG2, FCER1G, PIK3RS, LCP2, TYROBP                                    | 129        | 122      | 5738      | 4.74            | 0.001563801 | 5.22E-04  | 0.016439609 |
| KEGG_PATHWAY | mmu05322:Systemic lupus erythematosus              | 12    |   | 0.43   | 1.55E-05<br>C1QA, C1QB, C7, CD86, C4B, FCGR4, H2-DMB1, HIST1H4I, C1QC, FCGR1, IL10, FCGR3                                             | 129        | 103      | 5738      | 5.18            | 0.001652768 | 4.13E-04  | 0.017375573 |
| KEGG_PATHWAY | mmu04060:Cytokine-cytokine receptor interaction    | 18    |   | 0.65   | 2.48E-05<br>CCL2, CSF2RB2, CCL9, CCL8, IL10, CCL7, CCL17, CCL12, CCR5, IL10RA, CCR2, CX3CR1, CSF2RB, IL2RG, IL12B, XCL1, XCR1, CSF2RA | 129        | 244      | 5738      | 3.28            | 0.00265068  | 5.31E-04  | 0.027879105 |

**Table S2.G KEGG pathways significant at 336 hours**

| Category     | Term                               | Count | %    | PValue   | Genes                                                                                                                                                             | List Total | Pop Hits | Pop Total | Fold Enrichment | Bonferroni  | Benjamini | FDR         |
|--------------|------------------------------------|-------|------|----------|-------------------------------------------------------------------------------------------------------------------------------------------------------------------|------------|----------|-----------|-----------------|-------------|-----------|-------------|
| KEGG_PATHWAY | mmu04512:ECM-receptor interaction  | 18    | 2.36 | 7.85E-08 | IBSP, TNC, COL3A1, ITGB5, ITGA4, COL5A3, COL5A2, SDC2, COL5A1, CD44, COL1A2, COL6A2, COL6A1, COL1A1, THBS2, THBS3, SPP1, FN1                                      | 254        | 83       | 5738      | 4.90            | 1.08E-05    | 1.08E-05  | 9.24E-05    |
| KEGG_PATHWAY | mmu05416:Viral myocarditis         | 16    | 2.10 | 1.24E-05 | H2-K1, ITGAL, MYH3, H2-D1, H2-DMB1, ITGB2, MYH7, H2-AB1, MYH8, CD86, H2-EB1, SGCD, H2-AA, MYH13, MYH14, ABL2                                                      | 254        | 94       | 5738      | 3.85            | 0.001713391 | 8.57E-04  | 0.014623985 |
| KEGG_PATHWAY | mmu04062:Chemokinesignalingpathway | 23    | 3.01 | 1.34E-05 | PARD3, CCL2, ADCY7, NCF1, STASB, CXCL9, CCL9, CCL8, GNG11, PF4, CCL6, CCL12, CCR5, ADCY9, TIAM1, CXCR4, GNG10, CXCL16, GSK3B, CCR2, SOS2, PAK1, SHC2              | 254        | 182      | 5738      | 2.85            | 0.001841954 | 6.14E-04  | 0.015722211 |
| KEGG_PATHWAY | mmu04510:focal adhesion            | 24    | 3.15 | 1.64E-05 | IBSP, FLT1, TNC, COL3A1, ITGB5, ITGA4, COL5A3, COL5A2, COL5A1, GSK3B, BCL2, SOS2, COL6A2, GRLF1, COL1A2, COL6A1, COL1A1, PAK1, EGF, SHC2, THBS2, THBS3, SPP1, FN1 | 254        | 198      | 5738      | 2.74            | 0.00258263  | 5.65E-04  | 0.019279342 |

**Table S2.H KEGG pathways significant at 504 hours**

| Category     | Term                                 | Count | %    | PValue   | Genes                                                                                                                                                                                                                                            |
|--------------|--------------------------------------|-------|------|----------|--------------------------------------------------------------------------------------------------------------------------------------------------------------------------------------------------------------------------------------------------|
| KEGG_PATHWAY | mmu04512:ECM-receptor interaction    | 18    | 2.36 | 7.85E-08 | IBSP, TNC, COL3A1, ITGB5, ITGA4, COL5A3, COL5A2, SDC2, COL5A1, CD44, COL1A2, COL6A2, COL6A1, COL1A1, THBS2, THBS3, SPP1, FN1                                                                                                                     |
| KEGG_PATHWAY | mmu05416:Viral myocarditis           | 16    | 2.10 | 1.24E-05 | H2-K1, ITGAL, MYH3, H2-D1, H2-DMB1, ITGB2, MYH7, H2-AB1, MYH8, CD86, H2-EB1, SGCD, H2-AA, MYH13, MYH14, ABL2                                                                                                                                     |
| KEGG_PATHWAY | mmu04062:Chemokine signaling pathway | 23    | 3.01 | 1.34E-05 | TIAM1, CXCR4, GNG10, CXCL16, GSK3B, CCR2, SOS2, PAK1, SHC2, PARD3, CCL2, ADCY7, NCF1, STAT5B, CXCL9, CCL9, CCL8, GNG11, PF4, CCL6, CCL12, CCR5, ADCY9, IBSP, FLT1, TNC, COL3A1, ITGB5, ITGA4, COL5A3, COL5A2, COL5A1, GSK3B, BCL2, SOS2, COL6A2, |
| KEGG_PATHWAY | mmu04510:focal adhesion              | 24    | 3.15 | 1.64E-05 | GRLF1, COL1A2, COL6A1, COL1A1, PAK1, EGF, SHC2, THBS2, THBS3, SPP1, FN1                                                                                                                                                                          |

**Table S2.H KEGG pathways significant at 504 hours**

| List Total | Pop Hits | Pop Total | Fold Enrichment | Bonferroni  | Benjamini | FDR         |
|------------|----------|-----------|-----------------|-------------|-----------|-------------|
| 254        | 83       | 5738      | 4.90            | 1.08E-05    | 1.08E-05  | 9.24E-05    |
| 254        | 94       | 5738      | 3.85            | 0.001713391 | 8.57E-04  | 0.014623985 |
| 254        | 182      | 5738      | 2.85            | 0.001841954 | 6.14E-04  | 0.015722211 |
| 254        | 198      | 5738      | 2.74            | 0.002258263 | 5.65E-04  | 0.019279342 |

Table S2.I KEGG pathways significant at 672 hours

| Category     | Term                                         | Count | % | PValue | Genes                                                                                                                                                                                       | List Total | Pop Hits | Pop Total | Fold Enrichment | Bonferroni | Benjamini | FDR      |
|--------------|----------------------------------------------|-------|---|--------|---------------------------------------------------------------------------------------------------------------------------------------------------------------------------------------------|------------|----------|-----------|-----------------|------------|-----------|----------|
| KEGG_PATHWAY | mmu04512:ECM-receptor interaction            | 17    |   | 2.51   | 7.58E-08<br>IBSP, TNC, COL3A1, ITGA4, COL5A2, SDCC2, COL5A1, CD44, COMP, COL1A2, COL6A2, COL6A1, COL1A1, THBS2, COL11A1, THBS3, FN1                                                         | 223        | 83       | 5738      | 5.27            | 1.08E-05   | 1.08E-05  | 8.96E-05 |
| KEGG_PATHWAY | mmu04510:Focal adhesion                      | 26    |   | 3.85   | 1.21E-07<br>IBSP, CAV2, CAV1, MYL2, TNC, COL3A1, BCL2, COMP, COL6A2, COL6A1, PAK1, EGF, COL11A1, THBS2, THBS3, FN1, VAV3, IGF1, ITGA4, COL5A2, COL5A1, PDGFRA, COL1A2, GRLF1, COL1A1, PARVA | 223        | 198      | 5738      | 3.38            | 1.72E-05   | 8.62E-06  | 1.44E-04 |
| KEGG_PATHWAY | mmu04610:Complement and coagulation cascades | 15    |   | 2.22   | 7.70E-07<br>C3AR1, CFB, F13A1, SERPING1, C1S, C1QC, C1QA, C1QB, C1RA, CD55, F3, CFH, C2, CFB, PROS1                                                                                         | 223        | 75       | 5738      | 5.15            | 1.09E-04   | 3.64E-05  | 9.10E-04 |

**Table S3.** Significant GO clusters identified from the 168h time point that were obtained from differentially expressed genes that were determined to contribute the largest variance at that time point.

| Cluster 1: Enrichment Score: 11.54 |                                    |            |          |          |
|------------------------------------|------------------------------------|------------|----------|----------|
| Annotation                         | GO Term                            | Gene Count | P-value  | FDR      |
| GOTERM_BP_FAT                      | vasculature development            | 85         | 5.20E-14 | 9.70E-11 |
| GOTERM_BP_FAT                      | blood vessel development           | 83         | 1.00E-13 | 1.90E-10 |
| GOTERM_BP_FAT                      | blood vessel morphogenesis         | 69         | 4.30E-12 | 8.00E-09 |
| GOTERM_BP_FAT                      | angiogenesis                       | 48         | 3.00E-09 | 5.60E-06 |
| Cluster 2: Enrichment Score: 11.31 |                                    |            |          |          |
| Annotation                         | GO Term                            | Gene Count | P-value  | FDR      |
| GOTERM_CC_FAT                      | extracellular matrix               | 100        | 2.50E-14 | 3.60E-11 |
| SP_PIR_KEYWORD                     | extracellular matrix               | 76         | 7.40E-14 | 1.10E-10 |
| GOTERM_CC_FAT                      | proteinaceous extracellular matrix | 96         | 9.40E-14 | 1.40E-10 |
| GOTERM_CC_FAT                      | extracellular region part          | 179        | 1.10E-09 | 1.60E-06 |
| GOTERM_CC_FAT                      | extracellular matrix part          | 37         | 1.50E-08 | 2.20E-05 |
| Cluster 3: Enrichment Score: 9.38  |                                    |            |          |          |
| Annotation                         | GO Term                            | Gene Count | P-value  | FDR      |
| KEGG_PATHWAY                       | lysosome                           | 53         | 2.40E-12 | 3.00E-09 |
| SP_PIR_KEYWORD                     | lysosome                           | 52         | 5.60E-10 | 8.30E-07 |
| GOTERM_CC_FAT                      | lysosome                           | 60         | 1.00E-09 | 1.50E-06 |
| GOTERM_CC_FAT                      | lytic vacuole                      | 60         | 1.30E-09 | 1.90E-06 |
| GOTERM_CC_FAT                      | vacuole                            | 64         | 6.80E-09 | 9.90E-06 |
| Cluster 4: Enrichment Score: 7.85  |                                    |            |          |          |
| Annotation                         | GO Term                            | Gene Count | P-value  | FDR      |
| GOTERM_BP_FAT                      | vesicle-mediated transport         | 121        | 2.70E-10 | 5.00E-07 |
| GOTERM_BP_FAT                      | membrane invagination              | 61         | 2.10E-09 | 3.90E-06 |
| GOTERM_BP_FAT                      | endocytosis                        | 61         | 2.10E-09 | 3.90E-06 |
| GOTERM_BP_FAT                      | membrane organization              | 76         | 3.10E-08 | 5.70E-05 |
| SP_PIR_KEYWORD                     | endocytosis                        | 31         | 1.60E-05 | 2.40E-02 |
| Cluster 5: Enrichment Score: 7.18  |                                    |            |          |          |
| Annotation                         | GO Term                            | Gene Count | P-value  | FDR      |
| GOTERM_BP_FAT                      | actin filament-based process       | 61         | 1.10E-10 | 2.00E-07 |
| GOTERM_BP_FAT                      | actin cytoskeleton organization    | 57         | 5.60E-10 | 1.00E-06 |
| GOTERM_BP_FAT                      | actin filament organization        | 23         | 6.70E-06 | 1.20E-02 |
| GOTERM_BP_FAT                      | cytoskeleton organization          | 76         | 4.80E-05 | 8.80E-02 |
